# Supplementary material for: Machine-Learning- and Structure-Based Virtual Screening for Selecting Cinnamic Acid Derivatives as Leishmania major DHFR-TS Inhibitors
Source: MDPI journal article supplement (doi:10.3390/molecules29010179), 2023-12-28
Supplement: s1 [file s1]

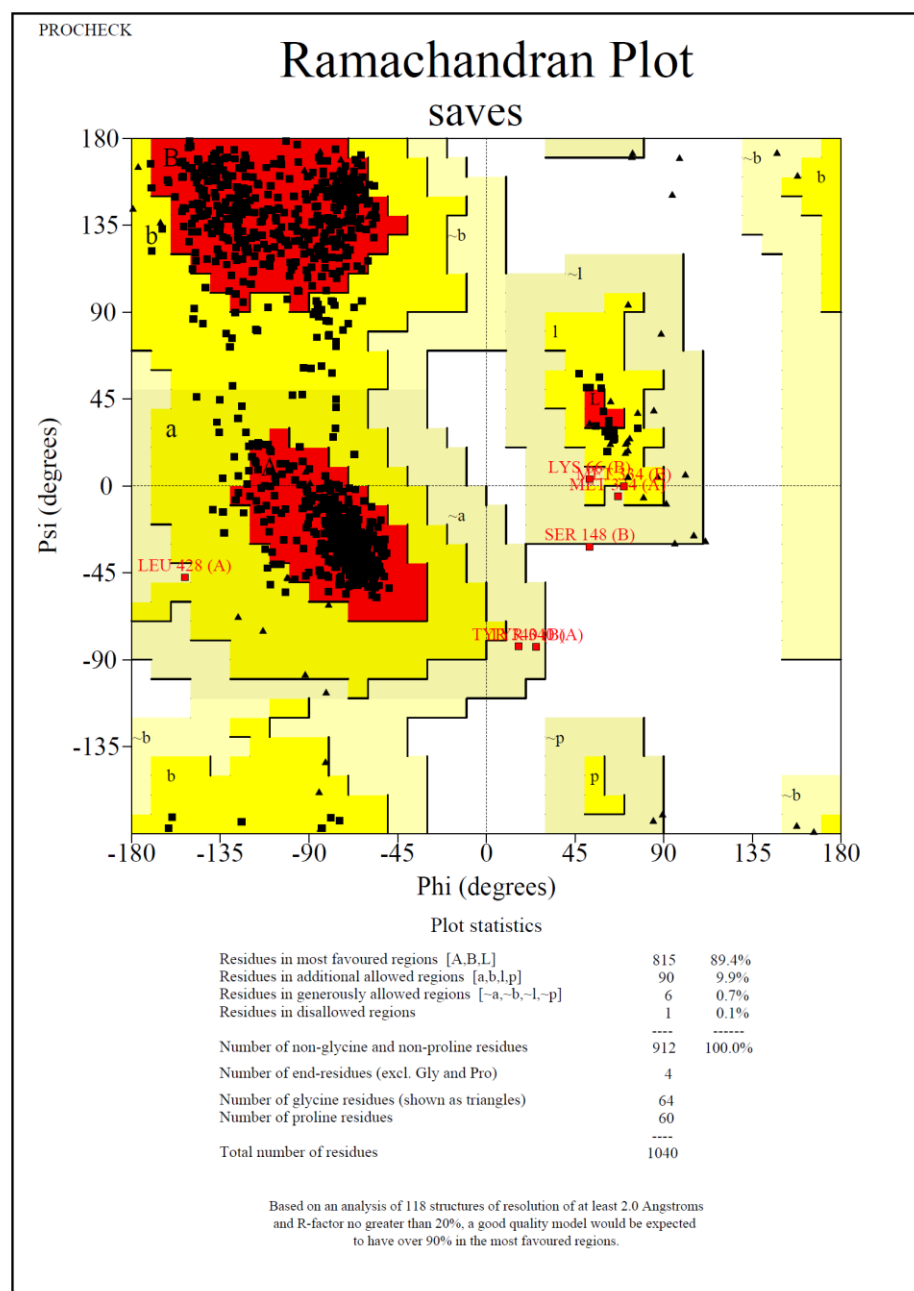

saves\_01.ps

**Figure S1:** Ramachandran plot of the *Lm*DHFR-TS.

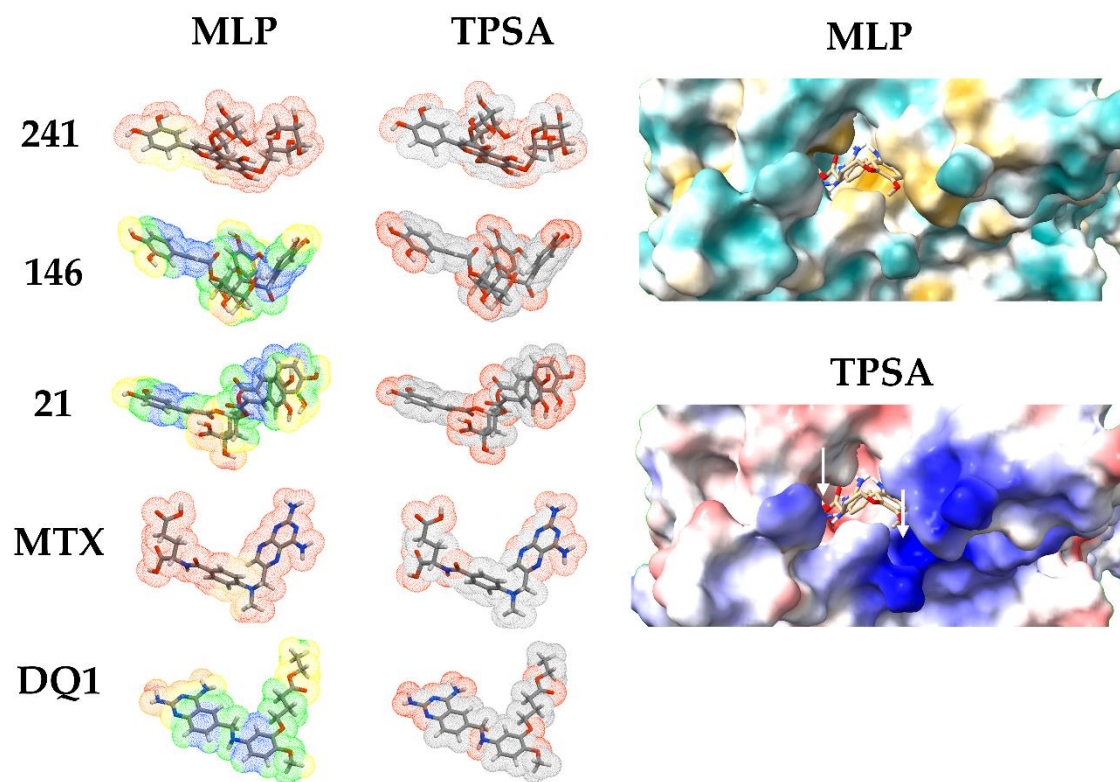

**Figure S2:** MLP and TPSA calculations for structures **241**, **146**, **21**, **DQ1** and **MTX**.
