# Supplementary material for: Machine-Learning- and Structure-Based Virtual Screening for Selecting Cinnamic Acid Derivatives as Leishmania major DHFR-TS Inhibitors
Source: Molecules. 2023 Dec 28;29(1):179. doi: 10.3390/molecules29010179 (PMC10779987; doi:10.3390/molecules29010179)
Supplement: Supplementary file 1 [file molecules-29-00179-s001.zip › Supplementary_material.xlsx]

## Sheet: Tabla S1
	Alvadesc Molecular Descriptors								Volsurf Molecular Descriptors
	Accuracy	Cohen's kappa	#False	#Correct	Error	Iteration		Descriptor	Accuracy	Cohen's kappa	#False	#Correct	Error	Iteration
VE2sign_Dz(p)	1	1	0	1	0	0.183908		LgD6	1	1	0	1	0	0.574803
Eta_D_epsiD	0.944444	0.939082	0.0555556	0.944444	0.0555556	0.515326		LgD5	1	0.997286	0	1	0	0.566929
VE1sign_Dz(p)	0.944444	0.943729	0.0555556	0.944444	0.0555556	0.181992		DD1	1	0.997286	0	1	0	0.944882
AVS_B(m)	0.944444	0.943729	0.0555556	0.944444	0.0555556	0.185824		LgS5	0.952381	0.940147	0.047619	0.952381	0.047619	0.787402
AVS_B(v)	0.888889	0.887438	0.111111	0.888889	0.111111	0.191571		LOGP n-Oct	0.952381	0.948357	0.047619	0.952381	0.047619	0.519685
VE2sign_Dz(v)	0.888889	0.88978	0.111111	0.888889	0.111111	0.178161		LgS7	0.904762	0.896655	0.0952381	0.904762	0.0952381	0.80315
ChiA_B(m)	0.888889	0.88978	0.111111	0.888889	0.111111	0.187739		LgD7	0.904762	0.904909	0.0952381	0.904762	0.0952381	0.582677
VE2_Dz(p)	0.888889	0.89212	0.111111	0.888889	0.111111	0.180077		L2LgS	0.904762	0.904909	0.0952381	0.904762	0.0952381	0.92126
SpMax_AEA(bo)	0.888889	0.89212	0.111111	0.888889	0.111111	0.534483		PSA	0.857143	0.84767	0.142857	0.857143	0.142857	0.535433
AVS_B(s)	0.888889	0.894459	0.111111	0.888889	0.111111	0.203065		LgS4	0.857143	0.84767	0.142857	0.857143	0.142857	0.779528
SM3_B(s)	0.888889	0.896796	0.111111	0.888889	0.111111	0.206897		LgD8	0.857143	0.85598	0.142857	0.857143	0.142857	0.598425
VE1sign_Dz(v)	0.833333	0.833489	0.166667	0.833333	0.166667	0.176245		LgD7.5	0.857143	0.858746	0.142857	0.857143	0.142857	0.590551
SpPosA_B(m)	0.833333	0.833489	0.166667	0.833333	0.166667	0.189655		LOGP c-Hex	0.857143	0.853212	0.142857	0.857143	0.142857	0.527559
SpDiam_AEA(ed)	0.833333	0.835851	0.166667	0.833333	0.166667	0.530651		DD2	0.857143	0.853212	0.142857	0.857143	0.142857	0.952756
SpMAD_AEA(ed)	0.833333	0.835851	0.166667	0.833333	0.166667	0.532567		%FU8	0.857143	0.84767	0.142857	0.857143	0.142857	0.661417
SpDiam_AEA(bo)	0.833333	0.835851	0.166667	0.833333	0.166667	0.536398		W2	0.809524	0.798667	0.190476	0.809524	0.190476	0.0393701
SpMAD_AEA(bo)	0.833333	0.835851	0.166667	0.833333	0.166667	0.538314		PSAR	0.809524	0.804247	0.190476	0.809524	0.190476	0.551181
SpMax_B(i)	0.833333	0.838211	0.166667	0.833333	0.166667	0.201149		PHSAR	0.809524	0.804247	0.190476	0.809524	0.190476	0.559055
SpMax1_Bh(e)	0.777778	0.770016	0.222222	0.777778	0.222222	0.396552		LgS7.5	0.809524	0.804247	0.190476	0.809524	0.190476	0.811024
SpMax2_Bh(m)	0.777778	0.772404	0.222222	0.777778	0.222222	0.39272		L4LgS	0.809524	0.809818	0.190476	0.809524	0.190476	0.937008
MATS5m	0.777778	0.774791	0.222222	0.777778	0.222222	0.227969		L3LgS	0.809524	0.820935	0.190476	0.809524	0.190476	0.929134
Eta_betaS_A	0.777778	0.774791	0.222222	0.777778	0.222222	0.492337		HSA	0.809524	0.807033	0.190476	0.809524	0.190476	0.543307
SpMAD_EA	0.777778	0.777176	0.222222	0.777778	0.222222	0.519157		DRDRDO	0.809524	0.807033	0.190476	0.809524	0.190476	0.700787
D/Dtr06	0.777778	0.77956	0.222222	0.777778	0.222222	0.0421456		DRACDO	0.809524	0.801458	0.190476	0.809524	0.190476	0.716535
Wap	0.777778	0.77956	0.222222	0.777778	0.222222	0.0613027		DIFF	0.809524	0.804247	0.190476	0.809524	0.190476	0.511811
SpMAD_EA(dm)	0.777778	0.77956	0.222222	0.777778	0.222222	0.52682		DD5	0.809524	0.815381	0.190476	0.809524	0.190476	0.976378
SpMAD_EA(ri)	0.777778	0.77956	0.222222	0.777778	0.222222	0.528736		%FU9	0.809524	0.798667	0.190476	0.809524	0.190476	0.669291
SpMAD_AEA(dm)	0.777778	0.77956	0.222222	0.777778	0.222222	0.54023		W6	0.761905	0.760871	0.238095	0.761905	0.238095	0.0708661
ATSC2e	0.777778	0.781941	0.222222	0.777778	0.222222	0.216475		W3	0.761905	0.758068	0.238095	0.761905	0.238095	0.0472441
ATSC2s	0.777778	0.781941	0.222222	0.777778	0.222222	0.218391		NCC	0.761905	0.763672	0.238095	0.761905	0.238095	0.503937
Chi0_EA(dm)	0.777778	0.781941	0.222222	0.777778	0.222222	0.542146		LgS6	0.761905	0.752455	0.238095	0.761905	0.238095	0.795276
EE_B(s)	0.777778	0.784321	0.222222	0.777778	0.222222	0.204981		LgS3	0.761905	0.755262	0.238095	0.761905	0.238095	0.771654
VE1sign_B(s)	0.777778	0.784321	0.222222	0.777778	0.222222	0.210728		LgD9	0.761905	0.760871	0.238095	0.761905	0.238095	0.606299
SpMax2_Bh(s)	0.722222	0.716028	0.277778	0.722222	0.277778	0.402299		ID4	0.761905	0.763672	0.238095	0.761905	0.238095	0.370079
P_VSA_charge_14	0.722222	0.716028	0.277778	0.722222	0.277778	0.488506		FLEX_RB	0.761905	0.760871	0.238095	0.761905	0.238095	0.496063
Eta_B	0.722222	0.716028	0.277778	0.722222	0.277778	0.501916		DD4	0.761905	0.774856	0.238095	0.761905	0.238095	0.968504
Eta_sh_p	0.722222	0.716028	0.277778	0.722222	0.277778	0.505747		W5	0.714286	0.714726	0.285714	0.714286	0.285714	0.0629921
Eta_epsi_4	0.722222	0.716028	0.277778	0.722222	0.277778	0.511494		SKIN	0.714286	0.717544	0.285714	0.714286	0.285714	0.874016
VE2sign_A	0.722222	0.718437	0.277778	0.722222	0.277778	0.132184		POL	0.714286	0.70626	0.285714	0.714286	0.285714	0.472441
P_VSA_s_4	0.722222	0.718437	0.277778	0.722222	0.277778	0.457854		MW	0.714286	0.709084	0.285714	0.714286	0.285714	0.480315
SpMAD_EA(bo)	0.722222	0.718437	0.277778	0.722222	0.277778	0.521073		LgS9	0.714286	0.70626	0.285714	0.714286	0.285714	0.826772
Eta_epsi_5	0.722222	0.720843	0.277778	0.722222	0.277778	0.51341		LgS8	0.714286	0.709084	0.285714	0.714286	0.285714	0.818898
Eta_D_beta	0.722222	0.720843	0.277778	0.722222	0.277778	0.517241		LgBB	0.714286	0.717544	0.285714	0.714286	0.285714	0.88189
D/Dtr08	0.722222	0.723248	0.277778	0.722222	0.277778	0.0440613		DD8	0.714286	0.711906	0.285714	0.714286	0.285714	1
ChiA_B(v)	0.722222	0.723248	0.277778	0.722222	0.277778	0.193487		DD6	0.714286	0.714726	0.285714	0.714286	0.285714	0.984252
SpMaxA_EA(dm)	0.722222	0.723248	0.277778	0.722222	0.277778	0.522989		DD3	0.714286	0.714726	0.285714	0.714286	0.285714	0.96063
MATS1m	0.722222	0.725651	0.277778	0.722222	0.277778	0.220307		CP	0.714286	0.714726	0.285714	0.714286	0.285714	0.464567
nR10	0.722222	0.728052	0.277778	0.722222	0.277778	0.0383142		W4	0.666667	0.665762	0.333333	0.666667	0.333333	0.0551181
SpPosA_B(p)	0.722222	0.728052	0.277778	0.722222	0.277778	0.199234		LgS10	0.666667	0.665762	0.333333	0.666667	0.333333	0.834646
VE2sign_B(s)	0.722222	0.728052	0.277778	0.722222	0.277778	0.212644		L0LgS	0.666667	0.671434	0.333333	0.666667	0.333333	0.905512
SsCH3	0.722222	0.728052	0.277778	0.722222	0.277778	0.662835		FLEX	0.666667	0.662924	0.333333	0.666667	0.333333	0.488189
SdCH2	0.722222	0.728052	0.277778	0.722222	0.277778	0.664751		DRACAC	0.666667	0.651547	0.333333	0.666667	0.333333	0.708661
SssCH2	0.722222	0.728052	0.277778	0.722222	0.277778	0.666667		DD7	0.666667	0.665762	0.333333	0.666667	0.333333	0.992126
nR06	0.722222	0.730452	0.277778	0.722222	0.277778	0.0344828		CD6	0.666667	0.668599	0.333333	0.666667	0.333333	0.417323
VE1_B(s)	0.722222	0.730452	0.277778	0.722222	0.277778	0.208812		CD4	0.666667	0.671434	0.333333	0.666667	0.333333	0.401575
SpMAD_L	0.666667	0.659631	0.333333	0.666667	0.333333	0.137931		CD1	0.666667	0.671434	0.333333	0.666667	0.333333	0.377953
SpMax1_Bh(m)	0.666667	0.659631	0.333333	0.666667	0.333333	0.390805		ACDODO	0.666667	0.662924	0.333333	0.666667	0.333333	0.748031
SpMin4_Bh(i)	0.666667	0.659631	0.333333	0.666667	0.333333	0.427203		%FU10	0.666667	0.65724	0.333333	0.666667	0.333333	0.677165
P_VSA_charge_10	0.666667	0.659631	0.333333	0.666667	0.333333	0.482759		%FU7	0.666667	0.65724	0.333333	0.666667	0.333333	0.653543
P_VSA_charge_11	0.666667	0.659631	0.333333	0.666667	0.333333	0.484674		%FU4	0.666667	0.660083	0.333333	0.666667	0.333333	0.629921
Eta_B_A	0.666667	0.659631	0.333333	0.666667	0.333333	0.503831		SOLY	0.619048	0.613922	0.380952	0.619048	0.380952	0.76378
SpMax7_Bh(m)	0.666667	0.662061	0.333333	0.666667	0.333333	0.394636		DRDRAC	0.619048	0.613922	0.380952	0.619048	0.380952	0.692913
Eta_alpha_A	0.666667	0.662061	0.333333	0.666667	0.333333	0.490421		CW5	0.619048	0.61678	0.380952	0.619048	0.380952	0.314961
JGI2	0.666667	0.664489	0.333333	0.666667	0.333333	0.371648		CW4	0.619048	0.61678	0.380952	0.619048	0.380952	0.307087
MaxDD	0.666667	0.666915	0.333333	0.666667	0.333333	0.0574713		CW3	0.619048	0.619635	0.380952	0.619048	0.380952	0.299213
SpAD_EA(dm)	0.666667	0.666915	0.333333	0.666667	0.333333	0.524904		CD8	0.619048	0.62534	0.380952	0.619048	0.380952	0.433071
H%	0.666667	0.66934	0.333333	0.666667	0.333333	0.01341		CD3	0.619048	0.62534	0.380952	0.619048	0.380952	0.393701
C%	0.666667	0.66934	0.333333	0.666667	0.333333	0.0153257		CD2	0.619048	0.619635	0.380952	0.619048	0.380952	0.385827
D/Dtr09	0.666667	0.66934	0.333333	0.666667	0.333333	0.045977		W7	0.571429	0.570653	0.428571	0.571429	0.428571	0.0787402
PJI2	0.666667	0.66934	0.333333	0.666667	0.333333	0.0555556		R	0.571429	0.570653	0.428571	0.571429	0.428571	0.015748
SM1_Dz(v)	0.666667	0.66934	0.333333	0.666667	0.333333	0.17433		MetStab	0.571429	0.579263	0.428571	0.571429	0.428571	0.889764
MATS4m	0.666667	0.66934	0.333333	0.666667	0.333333	0.226054		ID3	0.571429	0.573526	0.428571	0.571429	0.428571	0.362205
Eig02_EA(dm)	0.666667	0.66934	0.333333	0.666667	0.333333	0.547893		HTSflag	0.571429	0.579263	0.428571	0.571429	0.428571	0.897638
Eig06_EA(dm)	0.666667	0.66934	0.333333	0.666667	0.333333	0.555556		DODODO	0.571429	0.570653	0.428571	0.571429	0.428571	0.755906
Eig07_EA(dm)	0.666667	0.66934	0.333333	0.666667	0.333333	0.557471		CW8	0.571429	0.573526	0.428571	0.571429	0.428571	0.338583
Eig08_EA(dm)	0.666667	0.66934	0.333333	0.666667	0.333333	0.559387		CW6	0.571429	0.576396	0.428571	0.571429	0.428571	0.322835
Eig10_EA(dm)	0.666667	0.66934	0.333333	0.666667	0.333333	0.561303		CW1	0.571429	0.564903	0.428571	0.571429	0.428571	0.283465
Eig12_EA(dm)	0.666667	0.66934	0.333333	0.666667	0.333333	0.563218		CD7	0.571429	0.573526	0.428571	0.571429	0.428571	0.425197
Eig13_EA(dm)	0.666667	0.66934	0.333333	0.666667	0.333333	0.565134		CD5	0.571429	0.573526	0.428571	0.571429	0.428571	0.409449
Eig14_EA(dm)	0.666667	0.66934	0.333333	0.666667	0.333333	0.56705		ACACDO	0.571429	0.564903	0.428571	0.571429	0.428571	0.740157
Eig15_EA(dm)	0.666667	0.66934	0.333333	0.666667	0.333333	0.568966		W8	0.52381	0.515865	0.47619	0.52381	0.47619	0.0866142
Eig02_AEA(dm)	0.666667	0.66934	0.333333	0.666667	0.333333	0.58046		VD	0.52381	0.53032	0.47619	0.52381	0.47619	0.858268
MaxsssCH	0.666667	0.66934	0.333333	0.666667	0.333333	0.703065		PB	0.52381	0.521653	0.47619	0.52381	0.47619	0.850394
MW	0.666667	0.671762	0.333333	0.666667	0.333333	0		LgS11	0.52381	0.512967	0.47619	0.52381	0.47619	0.84252
ATS8s	0.666667	0.671762	0.333333	0.666667	0.333333	0.214559		IW3	0.52381	0.524544	0.47619	0.52381	0.47619	0.267717
H-051	0.666667	0.671762	0.333333	0.666667	0.333333	0.655172		DRDRDR	0.52381	0.504262	0.47619	0.52381	0.47619	0.685039
H-052	0.666667	0.671762	0.333333	0.666667	0.333333	0.657088		DRDODO	0.52381	0.51876	0.47619	0.52381	0.47619	0.724409
H-053	0.666667	0.671762	0.333333	0.666667	0.333333	0.659004		CW7	0.52381	0.51876	0.47619	0.52381	0.47619	0.330709
N-072	0.666667	0.671762	0.333333	0.666667	0.333333	0.66092		AUS7.4	0.52381	0.512967	0.47619	0.52381	0.47619	0.622047
SsssCH	0.666667	0.671762	0.333333	0.666667	0.333333	0.670498		%FU6	0.52381	0.515865	0.47619	0.52381	0.47619	0.645669
SaasC	0.666667	0.671762	0.333333	0.666667	0.333333	0.67433		LgD10	0.47619	0.469723	0.52381	0.47619	0.52381	0.614173
MCD	0.666667	0.674183	0.333333	0.666667	0.333333	0.0268199		ID1	0.47619	0.475545	0.52381	0.47619	0.52381	0.346457
NRS	0.666667	0.674183	0.333333	0.666667	0.333333	0.0287356		HL2	0.47619	0.475545	0.52381	0.47619	0.52381	0.448819
NNRS	0.666667	0.674183	0.333333	0.666667	0.333333	0.0306513		D8	0.47619	0.475545	0.52381	0.47619	0.52381	0.149606
nR09	0.666667	0.674183	0.333333	0.666667	0.333333	0.0363985		D6	0.47619	0.466809	0.52381	0.47619	0.52381	0.133858
PW2	0.666667	0.674183	0.333333	0.666667	0.333333	0.0632184		CACO2	0.47619	0.484261	0.52381	0.47619	0.52381	0.866142
SpMax1_Bh(p)	0.611111	0.603213	0.388889	0.611111	0.388889	0.398467		%FU5	0.47619	0.466809	0.52381	0.47619	0.52381	0.637795
SpMax6_Bh(s)	0.611111	0.603213	0.388889	0.611111	0.388889	0.409962		WO3	0.428571	0.426527	0.571429	0.428571	0.571429	0.173228
P_VSA_ppp_ar	0.611111	0.603213	0.388889	0.611111	0.388889	0.461686		WO1	0.428571	0.429453	0.571429	0.428571	0.571429	0.15748
GGI6	0.611111	0.605664	0.388889	0.611111	0.388889	0.363985		W1	0.428571	0.429453	0.571429	0.428571	0.571429	0.0314961
GGI9	0.611111	0.605664	0.388889	0.611111	0.388889	0.3659		L1LgS	0.428571	0.429453	0.571429	0.428571	0.571429	0.913386
JGI3	0.611111	0.605664	0.388889	0.611111	0.388889	0.373563		IW4	0.428571	0.420667	0.571429	0.428571	0.571429	0.275591
P_VSA_ppp_con	0.611111	0.605664	0.388889	0.611111	0.388889	0.463602		IW2	0.428571	0.432377	0.571429	0.428571	0.571429	0.259843
P_VSA_ppp_cyc	0.611111	0.605664	0.388889	0.611111	0.388889	0.465517		ACACAC	0.428571	0.417734	0.571429	0.428571	0.571429	0.732283
P_VSA_charge_2	0.611111	0.605664	0.388889	0.611111	0.388889	0.467433		A	0.428571	0.420667	0.571429	0.428571	0.571429	0.456693
P_VSA_charge_3	0.611111	0.605664	0.388889	0.611111	0.388889	0.469349		WN6	0.380952	0.383379	0.619048	0.380952	0.619048	0.244094
Eta_FL	0.611111	0.605664	0.388889	0.611111	0.388889	0.5		IW1	0.380952	0.38632	0.619048	0.380952	0.619048	0.251969
Eta_sh_y	0.611111	0.605664	0.388889	0.611111	0.388889	0.507663		ID2	0.380952	0.380436	0.619048	0.380952	0.619048	0.354331
Eta_sh_x	0.611111	0.605664	0.388889	0.611111	0.388889	0.509579		D2	0.380952	0.37749	0.619048	0.380952	0.619048	0.102362
BIC2	0.611111	0.608114	0.388889	0.611111	0.388889	0.126437		CW2	0.380952	0.37749	0.619048	0.380952	0.619048	0.291339
BIC3	0.611111	0.608114	0.388889	0.611111	0.388889	0.128352		S	0.333333	0.328436	0.666667	0.333333	0.666667	0.00787402
MATS5v	0.611111	0.608114	0.388889	0.611111	0.388889	0.243295		HL1	0.333333	0.340279	0.666667	0.333333	0.666667	0.440945
JGI1	0.611111	0.608114	0.388889	0.611111	0.388889	0.369732		G	0.333333	0.3314	0.666667	0.333333	0.666667	0.023622
P_VSA_charge_4	0.611111	0.608114	0.388889	0.611111	0.388889	0.471264		D7	0.333333	0.328436	0.666667	0.333333	0.666667	0.141732
P_VSA_charge_9	0.611111	0.608114	0.388889	0.611111	0.388889	0.480843		WO2	0.285714	0.279363	0.714286	0.285714	0.714286	0.165354
P_VSA_charge_12	0.611111	0.608114	0.388889	0.611111	0.388889	0.48659		WN5	0.285714	0.294256	0.714286	0.285714	0.714286	0.23622
MeanDD	0.611111	0.610561	0.388889	0.611111	0.388889	0.059387		WN4	0.285714	0.288305	0.714286	0.285714	0.714286	0.228346
SM1_Dz(Z)	0.611111	0.610561	0.388889	0.611111	0.388889	0.168582		WN3	0.285714	0.282346	0.714286	0.285714	0.714286	0.220472
MATS3m	0.611111	0.610561	0.388889	0.611111	0.388889	0.224138		WN1	0.285714	0.282346	0.714286	0.285714	0.714286	0.204724
D/Dtr10	0.611111	0.613007	0.388889	0.611111	0.388889	0.0478927		V	0.285714	0.282346	0.714286	0.285714	0.714286	0
ON0V	0.611111	0.613007	0.388889	0.611111	0.388889	0.0498084		WO6	0.238095	0.230272	0.761905	0.238095	0.761905	0.19685
VE1sign_Dt	0.611111	0.613007	0.388889	0.611111	0.388889	0.162835		WO4	0.238095	0.230272	0.761905	0.238095	0.761905	0.181102
VE1sign_Dz(m)	0.611111	0.613007	0.388889	0.611111	0.388889	0.170498		D5	0.238095	0.230272	0.761905	0.238095	0.761905	0.125984
MATS2m	0.611111	0.613007	0.388889	0.611111	0.388889	0.222222		WO5	0.190476	0.184183	0.809524	0.190476	0.809524	0.188976
MATS1v	0.611111	0.613007	0.388889	0.611111	0.388889	0.235632		WN2	0.142857	0.138112	0.857143	0.142857	0.857143	0.212598
SM13_AEA(ri)	0.611111	0.613007	0.388889	0.611111	0.388889	0.545977		D1	0.142857	0.132035	0.857143	0.142857	0.857143	0.0944882
Eig03_EA(dm)	0.611111	0.613007	0.388889	0.611111	0.388889	0.549808		D4	0.0952381	0.0920572	0.904762	0.0952381	0.904762	0.11811
Eig04_EA(dm)	0.611111	0.613007	0.388889	0.611111	0.388889	0.551724		D3	0	0	1	0	1	0.110236
Eig05_EA(dm)	0.611111	0.613007	0.388889	0.611111	0.388889	0.55364
Eig04_EA(ri)	0.611111	0.613007	0.388889	0.611111	0.388889	0.570881
nCrs	0.611111	0.613007	0.388889	0.611111	0.388889	0.591954
Mp	0.611111	0.615451	0.388889	0.611111	0.388889	0.00383142
D/Dtr05	0.611111	0.615451	0.388889	0.611111	0.388889	0.0402299
H-047	0.611111	0.615451	0.388889	0.611111	0.388889	0.651341
H-048	0.611111	0.615451	0.388889	0.611111	0.388889	0.653257
nDB	0.611111	0.617894	0.388889	0.611111	0.388889	0.0114943
Rbrid	0.611111	0.617894	0.388889	0.611111	0.388889	0.0249042
PW3	0.611111	0.617894	0.388889	0.611111	0.388889	0.0651341
SdsCH	0.611111	0.617894	0.388889	0.611111	0.388889	0.668582
nR05	0.611111	0.620334	0.388889	0.611111	0.388889	0.032567
PW4	0.611111	0.620334	0.388889	0.611111	0.388889	0.0670498
MAXDN	0.611111	0.620334	0.388889	0.611111	0.388889	0.0708812
SpMax3_Bh(s)	0.555556	0.546773	0.444444	0.555556	0.444444	0.404215
SpMin1_Bh(m)	0.555556	0.546773	0.444444	0.555556	0.444444	0.413793
TI2_L	0.555556	0.549246	0.444444	0.555556	0.444444	0.136015
GATS8s	0.555556	0.549246	0.444444	0.555556	0.444444	0.354406
JGI5	0.555556	0.549246	0.444444	0.555556	0.444444	0.377395
JGI6	0.555556	0.549246	0.444444	0.555556	0.444444	0.37931
JGI8	0.555556	0.549246	0.444444	0.555556	0.444444	0.383142
JGI10	0.555556	0.549246	0.444444	0.555556	0.444444	0.386973
SpMax5_Bh(s)	0.555556	0.549246	0.444444	0.555556	0.444444	0.408046
SpMax8_Bh(s)	0.555556	0.549246	0.444444	0.555556	0.444444	0.411877
Eta_C_A	0.555556	0.549246	0.444444	0.555556	0.444444	0.496169
VE1_A	0.555556	0.551717	0.444444	0.555556	0.444444	0.130268
Acon	0.555556	0.551717	0.444444	0.555556	0.444444	0.1341
AVS_X	0.555556	0.551717	0.444444	0.555556	0.444444	0.139847
VE2_X	0.555556	0.551717	0.444444	0.555556	0.444444	0.149425
GGI10	0.555556	0.551717	0.444444	0.555556	0.444444	0.367816
P_VSA_s_3	0.555556	0.551717	0.444444	0.555556	0.444444	0.455939
P_VSA_charge_8	0.555556	0.551717	0.444444	0.555556	0.444444	0.478927
Eta_betaP	0.555556	0.551717	0.444444	0.555556	0.444444	0.494253
PCR	0.555556	0.554187	0.444444	0.555556	0.444444	0.0862069
IC5	0.555556	0.554187	0.444444	0.555556	0.444444	0.114943
VE1_X	0.555556	0.554187	0.444444	0.555556	0.444444	0.14751
J_Dt	0.555556	0.554187	0.444444	0.555556	0.444444	0.16092
J_D/Dt	0.555556	0.554187	0.444444	0.555556	0.444444	0.166667
SpMin3_Bh(s)	0.555556	0.554187	0.444444	0.555556	0.444444	0.43295
P_VSA_LogP_4	0.555556	0.554187	0.444444	0.555556	0.444444	0.44636
phLevel2	0.555556	0.554187	0.444444	0.555556	0.444444	0.963602
DBI	0.555556	0.556654	0.444444	0.555556	0.444444	0.0517241
GNar	0.555556	0.556654	0.444444	0.555556	0.444444	0.0536398
Eig02_AEA(bo)	0.555556	0.556654	0.444444	0.555556	0.444444	0.574713
CATS2D_05_AA	0.555556	0.556654	0.444444	0.555556	0.444444	0.766284
CATS2D_06_AA	0.555556	0.556654	0.444444	0.555556	0.444444	0.768199
Chi_Dz(v)	0.555556	0.55912	0.444444	0.555556	0.444444	0.172414
SM12_AEA(ri)	0.555556	0.55912	0.444444	0.555556	0.444444	0.544061
Eig06_AEA(ed)	0.555556	0.55912	0.444444	0.555556	0.444444	0.572797
nCp	0.555556	0.55912	0.444444	0.555556	0.444444	0.588123
Mv	0.555556	0.561583	0.444444	0.555556	0.444444	0.00191571
VE2sign_B(v)	0.555556	0.561583	0.444444	0.555556	0.444444	0.197318
Eig03_AEA(dm)	0.555556	0.561583	0.444444	0.555556	0.444444	0.582375
Eig06_AEA(dm)	0.555556	0.561583	0.444444	0.555556	0.444444	0.586207
nArCO	0.555556	0.561583	0.444444	0.555556	0.444444	0.609195
SdssC	0.555556	0.561583	0.444444	0.555556	0.444444	0.672414
minaasC	0.555556	0.561583	0.444444	0.555556	0.444444	0.695402
nCIR	0.555556	0.564045	0.444444	0.555556	0.444444	0.0229885
PW5	0.555556	0.564045	0.444444	0.555556	0.444444	0.0689655
H-046	0.555556	0.564045	0.444444	0.555556	0.444444	0.649425
SpMax3_Bh(p)	0.5	0.490313	0.5	0.5	0.5	0.400383
SpMin1_Bh(e)	0.5	0.490313	0.5	0.5	0.5	0.421456
SpMax4_Bh(s)	0.5	0.492807	0.5	0.5	0.5	0.40613
MATS6v	0.5	0.4953	0.5	0.5	0.5	0.245211
GGI2	0.5	0.4953	0.5	0.5	0.5	0.356322
GGI3	0.5	0.4953	0.5	0.5	0.5	0.358238
JGI7	0.5	0.4953	0.5	0.5	0.5	0.381226
JGT	0.5	0.4953	0.5	0.5	0.5	0.388889
SpMin6_Bh(m)	0.5	0.4953	0.5	0.5	0.5	0.417625
SpMin1_Bh(v)	0.5	0.4953	0.5	0.5	0.5	0.41954
SpMin1_Bh(s)	0.5	0.4953	0.5	0.5	0.5	0.429119
SpMin4_Bh(s)	0.5	0.4953	0.5	0.5	0.5	0.434866
P_VSA_charge_5	0.5	0.4953	0.5	0.5	0.5	0.47318
CIC2	0.5	0.497791	0.5	0.5	0.5	0.122605
SpDiam_X	0.5	0.497791	0.5	0.5	0.5	0.143678
MATS4v	0.5	0.497791	0.5	0.5	0.5	0.241379
GGI4	0.5	0.497791	0.5	0.5	0.5	0.360153
P_VSA_ppp_L	0.5	0.497791	0.5	0.5	0.5	0.45977
CATS2D_03_AL	0.5	0.497791	0.5	0.5	0.5	0.791188
phLevel1	0.5	0.497791	0.5	0.5	0.5	0.961686
phLevel3	0.5	0.497791	0.5	0.5	0.5	0.965517
arLevel1	0.5	0.497791	0.5	0.5	0.5	0.967433
X2A	0.5	0.50028	0.5	0.5	0.5	0.091954
SIC1	0.5	0.50028	0.5	0.5	0.5	0.116858
CIC3	0.5	0.50028	0.5	0.5	0.5	0.124521
MATS6m	0.5	0.50028	0.5	0.5	0.5	0.229885
SpMin6_Bh(s)	0.5	0.50028	0.5	0.5	0.5	0.438697
CATS2D_07_LL	0.5	0.50028	0.5	0.5	0.5	0.833333
s2_relSize	0.5	0.50028	0.5	0.5	0.5	0.971264
s2_phSize	0.5	0.50028	0.5	0.5	0.5	0.97318
N%	0.5	0.502767	0.5	0.5	0.5	0.0172414
Chi_Dt	0.5	0.502767	0.5	0.5	0.5	0.157088
ChiA_Dt	0.5	0.502767	0.5	0.5	0.5	0.159004
VE2sign_Dt	0.5	0.502767	0.5	0.5	0.5	0.164751
VE1sign_B(v)	0.5	0.502767	0.5	0.5	0.5	0.195402
Eig03_AEA(bo)	0.5	0.502767	0.5	0.5	0.5	0.576628
nCs	0.5	0.502767	0.5	0.5	0.5	0.590038
nR=Ct	0.5	0.502767	0.5	0.5	0.5	0.599617
MaxssCH2	0.5	0.502767	0.5	0.5	0.5	0.699234
nTA	0.5	0.505252	0.5	0.5	0.5	0.00574713
RBN	0.5	0.505252	0.5	0.5	0.5	0.00766284
nCsp3	0.5	0.505252	0.5	0.5	0.5	0.0191571
Eig04_AEA(dm)	0.5	0.505252	0.5	0.5	0.5	0.584291
nArOH	0.5	0.507735	0.5	0.5	0.5	0.611111
nOHp	0.5	0.507735	0.5	0.5	0.5	0.613027
nOHt	0.5	0.507735	0.5	0.5	0.5	0.614943
nArOR	0.5	0.507735	0.5	0.5	0.5	0.616858
nOxiranes	0.5	0.507735	0.5	0.5	0.5	0.618774
nOxolanes	0.5	0.507735	0.5	0.5	0.5	0.62069
C-001	0.5	0.507735	0.5	0.5	0.5	0.622605
C-002	0.5	0.507735	0.5	0.5	0.5	0.624521
C-007	0.5	0.507735	0.5	0.5	0.5	0.630268
C-009	0.5	0.507735	0.5	0.5	0.5	0.632184
C-011	0.5	0.507735	0.5	0.5	0.5	0.6341
C-012	0.5	0.507735	0.5	0.5	0.5	0.636015
C-018	0.5	0.507735	0.5	0.5	0.5	0.637931
C-019	0.5	0.507735	0.5	0.5	0.5	0.639847
C-025	0.5	0.507735	0.5	0.5	0.5	0.641762
C-034	0.5	0.507735	0.5	0.5	0.5	0.645594
SaaaC	0.5	0.507735	0.5	0.5	0.5	0.676245
JGI4	0.444444	0.436348	0.555556	0.444444	0.555556	0.375479
SpMin2_Bh(m)	0.444444	0.436348	0.555556	0.444444	0.555556	0.415709
SpMin2_Bh(e)	0.444444	0.436348	0.555556	0.444444	0.555556	0.423372
GGI5	0.444444	0.438862	0.555556	0.444444	0.555556	0.362069
P_VSA_charge_6	0.444444	0.438862	0.555556	0.444444	0.555556	0.475096
P_VSA_charge_7	0.444444	0.438862	0.555556	0.444444	0.555556	0.477011
Eta_F_A	0.444444	0.438862	0.555556	0.444444	0.555556	0.498084
ChiA_X	0.444444	0.441374	0.555556	0.444444	0.555556	0.141762
SM5_X	0.444444	0.441374	0.555556	0.444444	0.555556	0.145594
GATS6s	0.444444	0.441374	0.555556	0.444444	0.555556	0.350575
JGI9	0.444444	0.441374	0.555556	0.444444	0.555556	0.385057
SpMin2_Bh(s)	0.444444	0.441374	0.555556	0.444444	0.555556	0.431034
CATS2D_08_LL	0.444444	0.441374	0.555556	0.444444	0.555556	0.835249
IC3	0.444444	0.443884	0.555556	0.444444	0.555556	0.113027
SIC4	0.444444	0.443884	0.555556	0.444444	0.555556	0.118774
H_Dt	0.444444	0.443884	0.555556	0.444444	0.555556	0.155172
MATS3v	0.444444	0.443884	0.555556	0.444444	0.555556	0.239464
SpMin8_Bh(s)	0.444444	0.443884	0.555556	0.444444	0.555556	0.440613
P_VSA_LogP_3	0.444444	0.443884	0.555556	0.444444	0.555556	0.444444
P_VSA_MR_4	0.444444	0.443884	0.555556	0.444444	0.555556	0.450192
P_VSA_MR_6	0.444444	0.443884	0.555556	0.444444	0.555556	0.454023
CATS2D_07_DL	0.444444	0.443884	0.555556	0.444444	0.555556	0.756705
CATS2D_01_AA	0.444444	0.443884	0.555556	0.444444	0.555556	0.762452
CATS2D_04_AA	0.444444	0.443884	0.555556	0.444444	0.555556	0.764368
CATS2D_02_AL	0.444444	0.443884	0.555556	0.444444	0.555556	0.789272
CATS2D_02_LL	0.444444	0.443884	0.555556	0.444444	0.555556	0.823755
nLevel6	0.444444	0.443884	0.555556	0.444444	0.555556	0.954023
nLevel8	0.444444	0.443884	0.555556	0.444444	0.555556	0.957854
nLevel10	0.444444	0.443884	0.555556	0.444444	0.555556	0.95977
s3_size	0.444444	0.443884	0.555556	0.444444	0.555556	0.969349
RBF	0.444444	0.446393	0.555556	0.444444	0.555556	0.00957854
Xindex	0.444444	0.446393	0.555556	0.444444	0.555556	0.109195
MATS8m	0.444444	0.446393	0.555556	0.444444	0.555556	0.233716
MATS8e	0.444444	0.446393	0.555556	0.444444	0.555556	0.262452
MaxsCH3	0.444444	0.446393	0.555556	0.444444	0.555556	0.697318
MaxdssC	0.444444	0.446393	0.555556	0.444444	0.555556	0.704981
CATS2D_02_NL	0.444444	0.446393	0.555556	0.444444	0.555556	0.806513
CATS2D_03_NL	0.444444	0.446393	0.555556	0.444444	0.555556	0.808429
CATS2D_04_NL	0.444444	0.446393	0.555556	0.444444	0.555556	0.810345
CATS2D_05_NL	0.444444	0.446393	0.555556	0.444444	0.555556	0.812261
CATS2D_06_NL	0.444444	0.446393	0.555556	0.444444	0.555556	0.814176
CATS2D_08_NL	0.444444	0.446393	0.555556	0.444444	0.555556	0.816092
CATS2D_09_NL	0.444444	0.446393	0.555556	0.444444	0.555556	0.818008
CATS2D_01_LL	0.444444	0.446393	0.555556	0.444444	0.555556	0.821839
Eig06_AEA(bo)	0.444444	0.448899	0.555556	0.444444	0.555556	0.578544
nR=Cs	0.444444	0.448899	0.555556	0.444444	0.555556	0.597701
nRCOOH	0.444444	0.448899	0.555556	0.444444	0.555556	0.601533
nArCOOR	0.444444	0.448899	0.555556	0.444444	0.555556	0.603448
nRCHO	0.444444	0.448899	0.555556	0.444444	0.555556	0.605364
nRCO	0.444444	0.448899	0.555556	0.444444	0.555556	0.60728
max_conj_path	0.444444	0.451404	0.555556	0.444444	0.555556	0.0210728
nCb-	0.444444	0.451404	0.555556	0.444444	0.555556	0.59387
C-026	0.444444	0.451404	0.555556	0.444444	0.555556	0.643678
C-040	0.444444	0.451404	0.555556	0.444444	0.555556	0.64751
MAXDP	0.444444	0.453907	0.555556	0.444444	0.555556	0.0727969
MATS7v	0.388889	0.382402	0.611111	0.388889	0.611111	0.247126
GATS7s	0.388889	0.382402	0.611111	0.388889	0.611111	0.35249
MATS3e	0.388889	0.384936	0.611111	0.388889	0.611111	0.254789
CATS2D_06_LL	0.388889	0.384936	0.611111	0.388889	0.611111	0.831418
s2_phRelSize	0.388889	0.384936	0.611111	0.388889	0.611111	0.977011
s1_relPathLength	0.388889	0.384936	0.611111	0.388889	0.611111	0.980843
s2_numSharedNeighbors	0.388889	0.384936	0.611111	0.388889	0.611111	0.984674
s4_numSharedNeighbors	0.388889	0.384936	0.611111	0.388889	0.611111	0.98659
VE2sign_X	0.388889	0.387468	0.611111	0.388889	0.611111	0.153257
MATS2v	0.388889	0.387468	0.611111	0.388889	0.611111	0.237548
MATS5e	0.388889	0.387468	0.611111	0.388889	0.611111	0.256705
MATS4s	0.388889	0.387468	0.611111	0.388889	0.611111	0.277778
SpMin5_Bh(s)	0.388889	0.387468	0.611111	0.388889	0.611111	0.436782
P_VSA_LogP_2	0.388889	0.387468	0.611111	0.388889	0.611111	0.442529
P_VSA_LogP_5	0.388889	0.387468	0.611111	0.388889	0.611111	0.448276
CATS2D_03_DA	0.388889	0.387468	0.611111	0.388889	0.611111	0.731801
CATS2D_05_DA	0.388889	0.387468	0.611111	0.388889	0.611111	0.733716
CATS2D_06_DA	0.388889	0.387468	0.611111	0.388889	0.611111	0.735632
CATS2D_07_DA	0.388889	0.387468	0.611111	0.388889	0.611111	0.737548
CATS2D_08_DA	0.388889	0.387468	0.611111	0.388889	0.611111	0.739464
CATS2D_05_DL	0.388889	0.387468	0.611111	0.388889	0.611111	0.752874
CATS2D_06_DL	0.388889	0.387468	0.611111	0.388889	0.611111	0.754789
CATS2D_08_DL	0.388889	0.387468	0.611111	0.388889	0.611111	0.758621
CATS2D_09_DL	0.388889	0.387468	0.611111	0.388889	0.611111	0.760536
CATS2D_09_LL	0.388889	0.387468	0.611111	0.388889	0.611111	0.837165
meanDistFromCC	0.388889	0.387468	0.611111	0.388889	0.611111	0.948276
nLevel3	0.388889	0.387468	0.611111	0.388889	0.611111	0.950192
nLevel5	0.388889	0.387468	0.611111	0.388889	0.611111	0.952107
nLevel7	0.388889	0.387468	0.611111	0.388889	0.611111	0.955939
s3_phSize	0.388889	0.387468	0.611111	0.388889	0.611111	0.975096
IC1	0.388889	0.389998	0.611111	0.388889	0.611111	0.111111
MATS7e	0.388889	0.389998	0.611111	0.388889	0.611111	0.260536
MATS2p	0.388889	0.389998	0.611111	0.388889	0.611111	0.264368
MaxssssC	0.388889	0.389998	0.611111	0.388889	0.611111	0.708812
CATS2D_07_AA	0.388889	0.389998	0.611111	0.388889	0.611111	0.770115
CATS2D_08_AA	0.388889	0.389998	0.611111	0.388889	0.611111	0.772031
CATS2D_02_AN	0.388889	0.389998	0.611111	0.388889	0.611111	0.773946
CATS2D_03_AN	0.388889	0.389998	0.611111	0.388889	0.611111	0.775862
CATS2D_04_AN	0.388889	0.389998	0.611111	0.388889	0.611111	0.777778
CATS2D_05_AN	0.388889	0.389998	0.611111	0.388889	0.611111	0.779693
CATS2D_06_AN	0.388889	0.389998	0.611111	0.388889	0.611111	0.781609
CATS2D_07_AN	0.388889	0.389998	0.611111	0.388889	0.611111	0.783525
CATS2D_08_AN	0.388889	0.389998	0.611111	0.388889	0.611111	0.785441
CATS2D_09_AN	0.388889	0.389998	0.611111	0.388889	0.611111	0.787356
CATS2D_06_AL	0.388889	0.389998	0.611111	0.388889	0.611111	0.796935
CATS2D_08_AL	0.388889	0.389998	0.611111	0.388889	0.611111	0.800766
CATS2D_01_NL	0.388889	0.389998	0.611111	0.388889	0.611111	0.804598
MDEC-11	0.388889	0.389998	0.611111	0.388889	0.611111	0.93295
rGes	0.388889	0.392526	0.611111	0.388889	0.611111	0.10728
MATS7m	0.388889	0.392526	0.611111	0.388889	0.611111	0.231801
nCconj	0.388889	0.392526	0.611111	0.388889	0.611111	0.595785
CATS2D_00_LL	0.388889	0.392526	0.611111	0.388889	0.611111	0.819923
Psi_i_t	0.388889	0.395052	0.611111	0.388889	0.611111	0.0747126
C-005	0.388889	0.395052	0.611111	0.388889	0.611111	0.626437
C-006	0.388889	0.395052	0.611111	0.388889	0.611111	0.628352
BAC	0.388889	0.397577	0.611111	0.388889	0.611111	0.0785441
minsssCH	0.388889	0.397577	0.611111	0.388889	0.611111	0.691571
mindssC	0.388889	0.400099	0.611111	0.388889	0.611111	0.693487
MATS2e	0.333333	0.328477	0.666667	0.333333	0.666667	0.252874
MATS5s	0.333333	0.328477	0.666667	0.333333	0.666667	0.279693
GATS1s	0.333333	0.328477	0.666667	0.333333	0.666667	0.340996
SHED_AA	0.333333	0.328477	0.666667	0.333333	0.666667	0.846743
MDEO-11	0.333333	0.328477	0.666667	0.333333	0.666667	0.942529
s3_phRelSize	0.333333	0.328477	0.666667	0.333333	0.666667	0.978927
piPC07	0.333333	0.33103	0.666667	0.333333	0.666667	0.0842912
VE1sign_X	0.333333	0.33103	0.666667	0.333333	0.666667	0.151341
GATS3v	0.333333	0.33103	0.666667	0.333333	0.666667	0.302682
GATS3i	0.333333	0.33103	0.666667	0.333333	0.666667	0.337165
GATS5s	0.333333	0.33103	0.666667	0.333333	0.666667	0.348659
SpMin7_Bh(p)	0.333333	0.33103	0.666667	0.333333	0.666667	0.425287
CATS2D_03_LL	0.333333	0.33103	0.666667	0.333333	0.666667	0.82567
CATS2D_05_LL	0.333333	0.33103	0.666667	0.333333	0.666667	0.829502
MDEO-12	0.333333	0.33103	0.666667	0.333333	0.666667	0.944444
s2_relPathLength_2	0.333333	0.33103	0.666667	0.333333	0.666667	0.982759
s2_numRotBonds	0.333333	0.33103	0.666667	0.333333	0.666667	0.988506
s3_numAroBonds	0.333333	0.33103	0.666667	0.333333	0.666667	0.996169
PCD	0.333333	0.333582	0.666667	0.333333	0.666667	0.0881226
X5A	0.333333	0.333582	0.666667	0.333333	0.666667	0.0938697
CIC1	0.333333	0.333582	0.666667	0.333333	0.666667	0.12069
GATS7m	0.333333	0.333582	0.666667	0.333333	0.666667	0.296935
GATS6v	0.333333	0.333582	0.666667	0.333333	0.666667	0.308429
P_VSA_MR_5	0.333333	0.333582	0.666667	0.333333	0.666667	0.452107
MaxaasC	0.333333	0.333582	0.666667	0.333333	0.666667	0.706897
MaxsOH	0.333333	0.333582	0.666667	0.333333	0.666667	0.710728
MaxdO	0.333333	0.333582	0.666667	0.333333	0.666667	0.712644
MaxssO	0.333333	0.333582	0.666667	0.333333	0.666667	0.714559
CATS2D_03_DD	0.333333	0.333582	0.666667	0.333333	0.666667	0.716475
CATS2D_04_DD	0.333333	0.333582	0.666667	0.333333	0.666667	0.718391
CATS2D_05_DD	0.333333	0.333582	0.666667	0.333333	0.666667	0.720307
CATS2D_06_DD	0.333333	0.333582	0.666667	0.333333	0.666667	0.722222
CATS2D_07_DD	0.333333	0.333582	0.666667	0.333333	0.666667	0.724138
CATS2D_08_DD	0.333333	0.333582	0.666667	0.333333	0.666667	0.726054
CATS2D_09_DD	0.333333	0.333582	0.666667	0.333333	0.666667	0.727969
CATS2D_02_DA	0.333333	0.333582	0.666667	0.333333	0.666667	0.729885
CATS2D_09_DA	0.333333	0.333582	0.666667	0.333333	0.666667	0.741379
CATS2D_02_DN	0.333333	0.333582	0.666667	0.333333	0.666667	0.743295
CATS2D_04_DN	0.333333	0.333582	0.666667	0.333333	0.666667	0.745211
CATS2D_07_DN	0.333333	0.333582	0.666667	0.333333	0.666667	0.747126
CATS2D_02_DL	0.333333	0.333582	0.666667	0.333333	0.666667	0.749042
CATS2D_05_AL	0.333333	0.333582	0.666667	0.333333	0.666667	0.795019
CATS2D_07_AL	0.333333	0.333582	0.666667	0.333333	0.666667	0.798851
CATS2D_09_AL	0.333333	0.333582	0.666667	0.333333	0.666667	0.802682
QEDu	0.333333	0.333582	0.666667	0.333333	0.666667	0.931034
MDEC-12	0.333333	0.333582	0.666667	0.333333	0.666667	0.934866
GATS4s	0.333333	0.336132	0.666667	0.333333	0.666667	0.346743
NssCH2	0.333333	0.336132	0.666667	0.333333	0.666667	0.680077
MaxdsCH	0.333333	0.336132	0.666667	0.333333	0.666667	0.701149
CATS2D_04_AL	0.333333	0.336132	0.666667	0.333333	0.666667	0.793103
SRW05	0.333333	0.338679	0.666667	0.333333	0.666667	0.0823755
X3v	0.333333	0.338679	0.666667	0.333333	0.666667	0.0957854
SssssC	0.333333	0.338679	0.666667	0.333333	0.666667	0.678161
Psi_i_0d	0.333333	0.341225	0.666667	0.333333	0.666667	0.0766284
minssCH2	0.333333	0.341225	0.666667	0.333333	0.666667	0.687739
MATS8v	0.277778	0.26942	0.722222	0.277778	0.722222	0.249042
MATS1e	0.277778	0.26942	0.722222	0.277778	0.722222	0.250958
GATS3s	0.277778	0.274572	0.722222	0.277778	0.722222	0.344828
SHED_DD	0.277778	0.274572	0.722222	0.277778	0.722222	0.83908
MDEC-44	0.277778	0.274572	0.722222	0.277778	0.722222	0.940613
GATS1m	0.277778	0.277145	0.722222	0.277778	0.722222	0.287356
GATS2m	0.277778	0.277145	0.722222	0.277778	0.722222	0.289272
GATS4v	0.277778	0.277145	0.722222	0.277778	0.722222	0.304598
GATS5v	0.277778	0.277145	0.722222	0.277778	0.722222	0.306513
GATS7v	0.277778	0.277145	0.722222	0.277778	0.722222	0.310345
GATS8v	0.277778	0.277145	0.722222	0.277778	0.722222	0.312261
B10[C-O]	0.277778	0.277145	0.722222	0.277778	0.722222	0.883142
B10[O-O]	0.277778	0.277145	0.722222	0.277778	0.722222	0.885057
MDEC-14	0.277778	0.277145	0.722222	0.277778	0.722222	0.936782
MDEO-22	0.277778	0.277145	0.722222	0.277778	0.722222	0.94636
s3_numRotBonds	0.277778	0.277145	0.722222	0.277778	0.722222	0.990421
s4_numAroBonds	0.277778	0.277145	0.722222	0.277778	0.722222	0.998084
s34_phRelSize	0.277778	0.277145	0.722222	0.277778	0.722222	1
X1A	0.277778	0.279716	0.722222	0.277778	0.722222	0.0900383
IDDE	0.277778	0.279716	0.722222	0.277778	0.722222	0.101533
MATS3p	0.277778	0.279716	0.722222	0.277778	0.722222	0.266284
CATS2D_04_DL	0.277778	0.279716	0.722222	0.277778	0.722222	0.750958
Ui	0.277778	0.279716	0.722222	0.277778	0.722222	0.90613
X0Av	0.277778	0.282285	0.722222	0.277778	0.722222	0.0977011
AAC	0.277778	0.282285	0.722222	0.277778	0.722222	0.0996169
LOC	0.277778	0.284853	0.722222	0.277778	0.722222	0.0804598
minaaCH	0.277778	0.287418	0.722222	0.277778	0.722222	0.689655
MATS6s	0.222222	0.218092	0.777778	0.222222	0.777778	0.281609
GATS8i	0.222222	0.218092	0.777778	0.222222	0.777778	0.33908
GATS2s	0.222222	0.218092	0.777778	0.222222	0.777778	0.342912
SHED_DA	0.222222	0.218092	0.777778	0.222222	0.777778	0.840996
SHED_NL	0.222222	0.218092	0.777778	0.222222	0.777778	0.848659
MATS7s	0.222222	0.220687	0.777778	0.222222	0.777778	0.283525
GATS8m	0.222222	0.220687	0.777778	0.222222	0.777778	0.298851
CATS2D_04_LL	0.222222	0.220687	0.777778	0.222222	0.777778	0.827586
B09[O-O]	0.222222	0.220687	0.777778	0.222222	0.777778	0.87931
B10[C-C]	0.222222	0.220687	0.777778	0.222222	0.777778	0.881226
MDEC-33	0.222222	0.220687	0.777778	0.222222	0.777778	0.938697
s4_numRotBonds	0.222222	0.220687	0.777778	0.222222	0.777778	0.992337
s2_numAroBonds	0.222222	0.220687	0.777778	0.222222	0.777778	0.994253
MATS6e	0.222222	0.22328	0.777778	0.222222	0.777778	0.258621
GATS2e	0.222222	0.22328	0.777778	0.222222	0.777778	0.316092
GATS7e	0.222222	0.22328	0.777778	0.222222	0.777778	0.32567
GATS6p	0.222222	0.22328	0.777778	0.222222	0.777778	0.329502
GATS1i	0.222222	0.22328	0.777778	0.222222	0.777778	0.333333
GATS2i	0.222222	0.22328	0.777778	0.222222	0.777778	0.335249
B07[C-C]	0.222222	0.22328	0.777778	0.222222	0.777778	0.863985
B07[C-O]	0.222222	0.22328	0.777778	0.222222	0.777778	0.8659
B07[O-O]	0.222222	0.22328	0.777778	0.222222	0.777778	0.867816
B08[C-C]	0.222222	0.22328	0.777778	0.222222	0.777778	0.869732
B08[C-O]	0.222222	0.22328	0.777778	0.222222	0.777778	0.871648
B08[O-O]	0.222222	0.22328	0.777778	0.222222	0.777778	0.873563
F09[C-O]	0.222222	0.22328	0.777778	0.222222	0.777778	0.900383
F10[C-O]	0.222222	0.22328	0.777778	0.222222	0.777778	0.902299
F10[O-O]	0.222222	0.22328	0.777778	0.222222	0.777778	0.904215
MLOGP2	0.222222	0.22328	0.777778	0.222222	0.777778	0.908046
GATS1e	0.222222	0.22587	0.777778	0.222222	0.777778	0.314176
GATS3e	0.222222	0.22587	0.777778	0.222222	0.777778	0.318008
IVDE	0.222222	0.228459	0.777778	0.222222	0.777778	0.103448
Ges	0.222222	0.228459	0.777778	0.222222	0.777778	0.105364
NssssC	0.222222	0.228459	0.777778	0.222222	0.777778	0.683908
NssO	0.222222	0.228459	0.777778	0.222222	0.777778	0.685824
SHED_LL	0.166667	0.161592	0.833333	0.166667	0.833333	0.850575
MATS8s	0.166667	0.164208	0.833333	0.166667	0.833333	0.285441
GATS4m	0.166667	0.164208	0.833333	0.166667	0.833333	0.293103
GATS2v	0.166667	0.164208	0.833333	0.166667	0.833333	0.300766
SHED_DN	0.166667	0.164208	0.833333	0.166667	0.833333	0.842912
SHED_DL	0.166667	0.164208	0.833333	0.166667	0.833333	0.844828
F01[C-C]	0.166667	0.164208	0.833333	0.166667	0.833333	0.886973
GATS7p	0.166667	0.166822	0.833333	0.166667	0.833333	0.331418
B02[O-O]	0.166667	0.166822	0.833333	0.166667	0.833333	0.854406
B03[O-O]	0.166667	0.166822	0.833333	0.166667	0.833333	0.856322
B04[O-O]	0.166667	0.166822	0.833333	0.166667	0.833333	0.858238
B05[O-O]	0.166667	0.166822	0.833333	0.166667	0.833333	0.860153
B06[O-O]	0.166667	0.166822	0.833333	0.166667	0.833333	0.862069
B09[C-C]	0.166667	0.166822	0.833333	0.166667	0.833333	0.875479
B09[C-O]	0.166667	0.166822	0.833333	0.166667	0.833333	0.877395
F05[C-C]	0.166667	0.166822	0.833333	0.166667	0.833333	0.89272
F08[C-O]	0.166667	0.166822	0.833333	0.166667	0.833333	0.896552
F09[C-C]	0.166667	0.166822	0.833333	0.166667	0.833333	0.898467
LLS_02	0.166667	0.166822	0.833333	0.166667	0.833333	0.929119
MATS6p	0.166667	0.169434	0.833333	0.166667	0.833333	0.272031
GATS8e	0.166667	0.169434	0.833333	0.166667	0.833333	0.327586
NdssC	0.166667	0.174653	0.833333	0.166667	0.833333	0.681992
GATS3m	0.111111	0.107708	0.888889	0.111111	0.888889	0.291188
T(N..N)	0.111111	0.107708	0.888889	0.111111	0.888889	0.85249
GATS6m	0.111111	0.110343	0.888889	0.111111	0.888889	0.295019
F02[C-N]	0.111111	0.110343	0.888889	0.111111	0.888889	0.888889
LLS_01	0.111111	0.110343	0.888889	0.111111	0.888889	0.927203
MATS2s	0.111111	0.112977	0.888889	0.111111	0.888889	0.273946
MATS3s	0.111111	0.112977	0.888889	0.111111	0.888889	0.275862
GATS6e	0.111111	0.112977	0.888889	0.111111	0.888889	0.323755
F07[C-C]	0.111111	0.112977	0.888889	0.111111	0.888889	0.894636
ESOL	0.111111	0.112977	0.888889	0.111111	0.888889	0.909962
GATS4e	0.0555556	0.0538438	0.944444	0.0555556	0.944444	0.319923
DLS_cons	0.0555556	0.0538438	0.944444	0.0555556	0.944444	0.925287
F02[O-O]	0.0555556	0.0564992	0.944444	0.0555556	0.944444	0.890805
SAscore	0.0555556	0.0564992	0.944444	0.0555556	0.944444	0.911877
DLS_02	0.0555556	0.0564992	0.944444	0.0555556	0.944444	0.913793
DLS_03	0.0555556	0.0564992	0.944444	0.0555556	0.944444	0.915709
MATS4p	0.0555556	0.0618041	0.944444	0.0555556	0.944444	0.268199
DLS_04	0	0	1	0	1	0.917625
DLS_05	0	0	1	0	1	0.91954
DLS_06	0	0	1	0	1	0.921456
DLS_07	0	0	1	0	1	0.923372
MATS5p	0	0.00267499	1	0	1	0.270115
GATS5e	0	0.00267499	1	0	1	0.321839

## Sheet: Table S2
Molecule	Name	SMILES	LB(AD)	LB(VS)	PSB	CA		True negative	VS	0.783
63	montamine	COC1=CC(\C=C\C(=O)N(CCC2=CNC3=CC=C(O)C=C23)N(CCC2=CNC3=CC=C(O)C=C23)C(=O)\C=C\C2=CC=C(O)C(OC)=C2)=CC=C1O	0.683	0.828	0.875757	0.780937			AD	0.825
242	6,8-di-C-B-glucopyranosylchrysin	[H]C1=CC=C(C=C1[H])C1=C([H])C(=O)C2=C(O1)C(OC[C@H]1O[C@@H](O)[C@H](O)[C@@H](O)[C@@H]1O)=C(O)C(OC[C@H]1O[C@@H](O)[C@H](O)[C@@H](O)[C@@H]1O)=C2O	0.524	0.86	0.927652	0.741608
96	4-O-Feruloyl 5-O-caffeoylquinic acid	COC1=C(O)C=CC(\C=C\C(=O)O[C@@H]2[C@H](O)C[C@](O)(C[C@H]2OC(=O)\C=C\C2=CC(O)=C(O)C=C2)C(O)=O)=C1	0.547	0.732	0.771625	0.66733
235	Apigenin 7-O-(6´´-caffeoyl)-glucoside	O[C@@H]1C(COC(=O)\C=C\C2=CC(O)=C(O)C=C2)O[C@@H](OC2=CC(O)=C3C(=O)C=C(OC3=C2)C2=CC=C(O)C=C2)C(O)[C@H]1O	0.699	0.474	0.882988	0.651867
241	lucenin-2 (6,8-di-C-B-glucopyranosylluteolin)	[H]C1=C(OC2=C(C1=O)C(O)=C(OC[C@H]1O[C@@H](O)[C@H](O)[C@@H](O)[C@@H]1O)C(O)=C2OC[C@H]1O[C@@H](O)[C@H](O)[C@@H](O)[C@@H]1O)C1=CC=C(O)C(O)=C1	0.528	0.551	1	0.63933
39	apigenin 7-O-rutinoside	C[C@@H]1O[C@@H](OC[C@H]2O[C@@H](OC3=CC(O)=C4C(=O)C=C(OC4=C3)C3=CC=C(O)C=C3)[C@H](O)[C@@H](O)[C@@H]2O)[C@H](O)[C@H](O)[C@H]1O	0.568	0.635	0.767598	0.63724
237	Lithospermic acid	OC(=O)[C@@H](CC1=CC(O)=C(O)C=C1)OC(=O)\C=C\C1=C2[C@@H]([C@H](OC2=C(O)C=C1)C1=CC(O)=C(O)C=C1)C(O)=O	0.61	0.547	0.839554	0.635439
306	diarctigenin	COC1=CC(C[C@@H]2[C@@H](CC3=CC(OC)=C(OC)C=C3)COC2=O)=CC(=C1O)C1=CC(C[C@H]2[C@H](CC3=CC(OC)=C(OC)C=C3)COC2=O)=CC(OC)=C1O	0.635	0.525	0.827413	0.634193
165	5-malonyl-1,3,4-tricaffeoylquinic acid	OC(=O)CC(=O)O[C@@H]1C[C@](C[C@@H](OC(=O)\C=C\C2=CC=C(O)C(O)=C2)[C@H]1OC(=O)\C=C\C1=CC(O)=C(O)C=C1)(OC(=O)\C=C\C1=CC(O)=C(O)C=C1)C(O)=O	0.531	0.597	0.884979	0.633356
140	Hesperidin	COC1=C(O)C=C(C=C1)C1CC(=O)C2=C(O)C=C(O[C@@H]3C[C@H](CO[C@@H]4C[C@@H](C)[C@H](O)[C@@H](O)[C@H]4O)[C@@H](O)[C@H](O)[C@H]3O)C=C2O1	0.594	0.511	0.913636	0.63125
308	Isolappaol A	[H][C@]1(CC2=CC=C(O)C(OC)=C2)COC(=O)[C@]1([H])CC1=CC(OC)=C2O[C@]([H])(C3=CC=C(O)C(OC)=C3)[C@@]([H])(CO)C2=C1	0.573	0.5879	0.814075	0.631082
20	3-Caffeoyl-5-p-coumaroylquinic acid	COC1=C(O)C=CC(\C=C\C(=O)O[C@@H]2C[C@@](O)(C[C@@H](OC(=O)\C=C\C3=CC(O)=C(O)C=C3)[C@H]2O)C(O)=O)=C1	0.53	0.641	0.791449	0.629688
164	1,3,5-tricaffeoylquinic acid	O[C@H]1[C@@H](C[C@](C[C@H]1OC(=O)C=CC1=CC(O)=C(O)C=C1)(OC(=O)C=CC1=CC(O)=C(O)C=C1)C(O)=O)OC(=O)C=CC1=CC(O)=C(O)C=C1	0.566	0.506	0.960441	0.628383
21	3,4,5-Tricaffeoylquinic acid	OC(=O)C1(O)C[C@@H](OC(=O)\C=C\C2=CC(O)=C(O)C=C2)C(OC(=O)\C=C\C2=CC(O)=C(O)C=C2)[C@@H](C1)OC(=O)\C=C\C1=CC(O)=C(O)C=C1	0.567	0.486	0.960122	0.620971
246	3-O-(6′′-O-(E)-p-coumaroyl)- B-glucopyranosylisorhamnetin	[H][C@]1(OC2=C(OC3=CC(O)=CC(O)=C3C2=O)C2=CC(OC)=C(O)C=C2)O[C@@H](COC(=O)\C=C\C2=CC=C(O)C=C2)[C@H](O)[C@@H](O)[C@@H]1O	0.636	0.502	0.797975	0.619301
314	prepicrasmalignan	COC1=CC(\C=C\C=O)=CC2=C1O[C@H]([C@@H]2CO)C1=CC([C@H](CO)[C@@H](O)C2=CC(OC)=C(O)C=C2)=C(O)C(OC)=C1	0.579	0.532	0.817697	0.612615
307	Lappaol A	[H][C@]1(CC2=CC3=C(O[C@]([H])(C4=CC(OC)=C(O)C=C4)[C@@]3([H])CO)C(OC)=C2)COC(=O)[C@]1([H])CC1=CC(OC)=C(O)C=C1	0.57	0.537	0.811054	0.609543
292	4-(3,4-dihydroxybenzyl)-2-(3,4-dihydroxyphenyl)tetrahydrofuran-3-carboxy-O-β-D-glucopyranosyl-2′-O-methacrylate	CC(=C)C(=O)OC[C@H]1O[C@@H](OC(=O)[C@H]2[C@@H](CC3=CC(O)=C(O)C=C3)CO[C@@H]2C2=CC(O)=C(O)C=C2)[C@H](O)[C@@H](O)[C@@H]1O	0.578	0.551	0.770418	0.60931
48	luteolin 7-O-rhamnoside	C[C@@H]1O[C@@H](O[C@@H]2[C@@H](O)[C@H](O)[C@@H](CO)O[C@H]2OC2=CC(O)=C3C(=O)C=C(OC3=C2)C2=CC(O)=C(O)C=C2)[C@H](O)[C@H](O)[C@H]1O	0.565	0.525	0.813514	0.603454
213	Yunnaneic acid F	OC(=O)[C@@H](CC1=CC(O)=C(O)C=C1)OC(=O)\C=C\C1=C[C@@H]2[C@@H]([C@H]([C@H]1[C@]1(O)OC(=O)C[C@]21O)C(O)=O)C1=CC(O)=C(O)C=C1	0.533	0.512	0.866429	0.597233
312	prebalanophonin	COC1=CC(\C=C\C=O)=CC([C@@H](CO)[C@H](O)C2=CC(OC)=C(O)C=C2)=C1O	0.476	0.765	0.516227	0.596554
206	3-[10-Acetoxygeranyl]-4-acetoxy-p-coumaric acid	CC(C)=CCC\C(COC(C)=O)=C\CC1=CC(\C=C\C(O)=O)=CC=C1OC(C)=O	0.501	0.681	0.616754	0.595769
232	apigenin 7-o-neohesperidoside	CC1OC(OC2C(O)C(O)C(CO)OC2OC2=CC(O)=C3C(=O)C=C(OC3=C2)C2=CC=C(O)C=C2)C(O)C(O)C1O	0.565	0.51	0.783155	0.591061
305	Dihydrocubebin	OC[C@H](CC1=CC2=C(OCO2)C=C1)[C@H](CO)CC1=CC2=C(OCO2)C=C1	0.422	0.769	0.576505	0.589796
146	bartericin A	CC(C)=CCC1=C(O)C=CC(\C=C\C(=O)C2=CC(CC(O)C(C)=C)=C(O)C=C2O)=C1	0.564	0.609	0.576021	0.584021
157	7-Hydroxycoumarin glucuronide	O[C@@H]1[C@@H](O)[C@H](OC2=CC3=C(C=CC(=O)O3)C=C2)O[C@@H]([C@H]1O)C(O)=O	0.51	0.704	0.50346	0.583646
252	isovitexin-2′′-O-xyloside	OCC1O[C@H](C(O[C@@H]2OC[C@@H](O)[C@H](O)C2O)[C@@H](O)[C@@H]1O)C1=C(O)C2=C(OC(=CC2=O)C2=CC=C(O)C=C2)C=C1O	0.544	0.553	0.684303	0.57793
89	3,5-di-O-caffeoylquinic acid	OC1[C@H](CC(O)(C[C@@H]1OC(=O)\C=C\C1=CC(O)=C(O)C=C1)C(O)=O)OC(=O)\C=C\C1=CC(O)=C(O)C=C1	0.547	0.495	0.781996	0.577877
187	arctiin	[H]C1=C(OO[C@@H]2O[C@H](CO)[C@@H](O)[C@H](O)[C@H]2O)C(OC)=CC(C[C@]2([H])C(=O)OC[C@@]2([H])CC2=CC(OC)=C(OC)C=C2)=C1	0.573	0.493	0.737107	0.577659
43	luteolin 4´-O-glucoside	OC[C@H]1O[C@@H](OC2=C(O)C=C(C=C2)C2=CC(=O)C3=C(O)C=C(O)C=C3O2)[C@H](O)[C@@H](O)[C@@H]1O	0.504	0.62	0.634661	0.57724
195	p-Coumaroyl-O-caffeoylquinic acid	O[C@@H]1C[C@](O)(C[C@@H](OC(=O)\C=C\C2=CC=C(O)C=C2)[C@@H]1OC(=O)\C=C\C1=CC=C(O)C(O)=C1)C(O)=O	0.55	0.532	0.705284	0.576734
283	pinoresinol-1-yl- d-glucopyranoside	OC[C@H]1O[C@@H](OC(=O)C2=CC3=C(O2)C=CC(O[C@@H]2O[C@H](CO)[C@@H](O)[C@H](O)[C@H]2O)=C3CCC2=CC=C(O)C=C2)[C@H](O)[C@@H](O)[C@@H]1O	0.562	0.407	0.904787	0.576414
313	picrasmalignan	COC1=CC(\C=C\C=O)=CC2=C1O[C@H]([C@@H]2CO)C1=CC2=C(O[C@@H]([C@H]2CO)C2=CC(OC)=C(O)C=C2)C(OC)=C1	0.553	0.532	0.695111	0.575714
94	3,4-O-Caffeoylquinic acid	O[C@@H]1C[C@](O)(C[C@@H](OC(=O)\C=C\C2=CC(O)=C(O)C=C2)[C@@H]1OC(=O)\C=C\C1=CC(O)=C(O)C=C1)C(O)=O	0.543	0.491	0.786343	0.575688
52	isoetin 4´-O-glucuronide	OC1C(O)[C@H](OC2=C(O)C=C(C(O)=C2)C2=CC(=O)C3=C(O)C=C(O)C=C3O2)O[C@@H]([C@H]1O)C(O)=O	0.516	0.595	0.648293	0.575277
150	3-O-betulinic acid-p-coumarate	[H][C@]12C[C@@H](C[C@@]1(CC[C@]1(C)C2CCC2[C@@]3(C)CC[C@H](OC(=O)\C=C\C4=CC=C(O)C=C4)C(C)(C)C3CC[C@@]12C)[O]=[OH])C(C)=C	0.651	0.528	0.518629	0.574681
17	4,5-Dicaffeoylquinic acid	O[C@@H]1C[C@@](O)(C[C@@H](OC(=O)\C=C\C2=CC(O)=C(O)C=C2)[C@H]1OC(=O)\C=C\C1=CC(O)=C(O)C=C1)C(O)=O	0.543	0.508	0.746714	0.573666
61	moschamine	COC1=C(O)C=CC(\C=C\C(=O)NCCC2=CNC3=C2C=C(O)C=C3)=C1	0.597	0.561	0.549453	0.572752
233	luteolin-3' 7-di-o-glucoside	OC[C@H]1O[C@@H](OC2=CC(O)=C3C(=O)C=C(OC3=C2)C2=CC(O[C@@H]3O[C@H](CO)[C@@H](O)[C@H](O)[C@H]3O)=C(O)C=C2)[C@H](O)[C@@H](O)[C@@H]1O	0.549	0.462	0.813452	0.572726
16	1,3-Dicaffeoylquinic acid	OC1[C@@H](CC(O)(C[C@H]1OC(=O)\C=C\C1=CC(O)=C(O)C=C1)C(O)=O)OC(=O)\C=C\C1=CC(O)=C(O)C=C1	0.547	0.498	0.750767	0.57226
204	4´-geranyloxyisoliquiritigenin	CC(=C)CCC\C(C)=C\COC1=CC=C(C(=O)\C=C\C2=CC=C(O)C=C2)C(O)=C1	0.614	0.555	0.525919	0.572056
6	trans-3,5-O-dicaffeoylquinic acid	O[C@H]1[C@@H](C[C@](O)(C[C@H]1OC(=O)C=CC1=CC(O)=CC(O)=C1)C(O)=O)OC(=O)C=CC1=CC(O)=C(O)C=C1	0.539	0.466	0.813988	0.57043
44	luteolin 4´-O-glucuronide	O[C@H]1COC(OC2=CC=C(C=C2O)C2=CC(=O)C3=C(O)C=C(O)C=C3O2)[C@H](O)[C@H]1O	0.515	0.611	0.587786	0.567941
42	luteolin 4´-O-arabinoside	O[C@H]1CO[C@@H](OC2=CC=C(C=C2O)C2=CC(=O)C3=C(O)C=C(O)C=C3O2)[C@H](O)[C@H]1O	0.515	0.611	0.587316	0.567839
35	apigenin 4´-O-glucuronide	[H]OC1=CC(O)=C2C(=O)C=C(OC2=C1)C1=CC=C(O[C@@H]2O[C@@H]([C@@H](O)[C@H](O)[C@H]2O)C(O)=O)C=C1	0.507	0.625	0.567829	0.565859
282	okanin 4´-O-(6-O-malonyl-B-glucopyranoside	O[C@@H]1[C@@H](COC(=O)CC(O)=O)O[C@@H](OC2=C(O)C(O)=C(C=C2)C(=O)\C=C\C2=CC=C(O)C(O)=C2)[C@H](O)[C@H]1O	0.539	0.478	0.767884	0.565068
27	4-hydroxy-E-cinnamomic acid 4-B-D-glucopyranosyloxybenzyl ester	OC[C@@H]1OC(OCC(=O)OC2=CC=C(COC(=O)\C=C\C3=CC=C(O)C=C3)C=C2)[C@@H](O)[C@H](O)[C@H]1O	0.562	0.49	0.703819	0.564917
192	moschamine	[H]N(CCC1=CN([H])C2=CC=C(O)C=C12)C(=O)\C=C\C1=CC=C(O)C(OC)=C1	0.597	0.534	0.55886	0.564346
243	3,4-di-O-(E)-feruloylquinic acid	COC1=C(O)C=CC(\C=C\C(=O)OC2C[C@](O)(CC(O)[C@@H]2OC(=O)\C=C\C2=CC(OC)=C(O)C=C2)C(O)=O)=C1	0.547	0.454	0.783709	0.562384
155	Tiliroside	O[C@@H]1[C@@H](COC(=O)\C=C\C2=CC=C(O)C=C2)O[C@@H](OC2=C(OC3=CC(O)=CC(O)=C3C2=O)C2=CC=C(O)C=C2)[C@H](O)[C@H]1O	0.631	0.383	0.756482	0.562271
62	cis-moschamine	COC1=C(O)C=CC(\C=C/C(=O)NCCC2=CNC3=C2C=C(O)C=C3)=C1	0.597	0.519	0.562211	0.559269
19	3-Caffeoyl-4-p-coumaroylquinic acid	COC1=C(O)C=CC(\C=C/C(=O)OC2C(O)CC(O)(CC2OC(=O)\C=C/C2=CC(O)=C(O)C=C2)C(O)=O)=C1	0.547	0.414	0.837818	0.558649
34	apigenin 4´-O-glucoside	OC[C@H]1O[C@@H](OC2=CC=C(C=C2)C2=CC(=O)C3=C(O)C=C(O)C=C3O2)[C@H](O)[C@@H](O)[C@@H]1O	0.499	0.627	0.544227	0.558343
87	butein 4'-O-glucopyranosyl	[H]\C(=C/C1=CC(O)=C(O)C=C1)C(=O)C1=CC=C(O[C@H]2O[C@@H](CO)[C@H](O)[C@@H](O)[C@@H]2O)C=C1O	0.59	0.512	0.581444	0.557962
251	kaempferol-3-O-rutinoside	C[C@@H]1O[C@@H](OC[C@H]2O[C@@H](OC3=C(OC4=CC(O)=CC(O)=C4C3=O)C3=CC=C(O)C=C3)[C@H](O)[C@@H](O)[C@@H]2O)[C@H](O)[C@H](O)[C@H]1O	0.56	0.445	0.74136	0.55486
67	(E) N-(4-hydroxycinnamoyl)-5-methoxytryptamine	[H]C1=CC(\C=C\C(=O)NCCC2=CNC3=CC=C(OC)C=C23)=CC=C1O	0.644	0.495	0.496792	0.5544
257	3-[4′-acetoxyprenyl]-5-[4″- hydroxyprenyl]-7(Z)-p-coumaric acid	CC(=O)OC\C(C)=C/CC1=C(O)C(C\C=C(\C)CO)=CC(\C=C/C(O)=O)=C1	0.409	0.695	0.56313	0.553112
97	4-Caffeoyl-5-feruloylquinic acid	COC1=C(O)C=CC(\C=C\C(=O)O[C@@H]2C[C@@](O)(C[C@@H](O)[C@H]2OC(=O)\C=C\C2=CC(O)=C(O)C=C2)C(O)=O)=C1	0.546	0.403	0.827137	0.551679
47	luteolin 7-O-glucuronide	O[C@@H]1[C@@H](O)[C@H](OC2=CC(O)=C3C(=O)C=C(OC3=C2)C2=CC(O)=C(O)C=C2)O[C@@H]([C@H]1O)C(O)=O	0.517	0.534	0.643441	0.551017
166	Apigenin acetyl glycoside	CC(=O)OC1C(O)C(O)C(CO)OC1OC1=CC(O)=C2C(=O)C=C(OC2=C1)C1=CC=C(O)C=C1	0.54	0.528	0.610147	0.55058
309	cartamoside	COC1=C(OC)C=C(C[C@H]2COC(=O)[C@]2(O)CC2=CC(OC)=C(O[C@@H]3O[C@H](CO)[C@@H](O)[C@H](O)[C@H]3O)C=C2)C=C1	0.551	0.374	0.862949	0.55021
37	apigenin 7-O-arabinoside	O[C@@H]1[C@@H](O)[C@H](OC2=CC(O)=C3C(=O)C=C(OC3=C2)C2=CC=C(O)C=C2)O[C@@H]([C@H]1O)C(O)=O	0.517	0.554	0.603756	0.550144
203	p-hydroxycordoin	[H]CC(C)=CCOC1=CC=C(C(=O)\C=C\C2=CC=C(O)C=C2)C(O)=C1	0.584	0.576	0.435752	0.548733
186	Quercetagetin-methyl ether-O-hexcoside	OC[C@H]1O[C@@H](OC2=CC3=C(C(O)=C2O)C(=O)C(O)=C(O3)C2=CC(O)=C(O)C=C2)[C@H](O)[C@@H](O)[C@@H]1O	0.533	0.5	0.664043	0.548669
49	luteolin 7-O-rutinoside	OC[C@H]1O[C@@H](OC[C@H]2OC(OC3=CC(O)=C4C(=O)C=C(OC4=C3)C3=CC(O)=C(O)C=C3)[C@H](O)[C@@H](O)[C@@H]2O)[C@H](O)C(O)[C@H]1O	0.555	0.373	0.8491	0.548401
147	stipulin	CC(C)=CCC1=CC(\C=C\C(=O)C2=C(O)C=C(O)C(CC=C(C)C)=C2)=CC=C1O	0.568	0.507	0.580139	0.547031
68	(Z) N-(4-hydroxycinnamoyl)-5-methoxytryptamine	[H]C1=CC(\C=C/C(=O)NCCC2=CNC3=CC=C(OC)C=C23)=CC=C1O	0.644	0.459	0.517805	0.545031
253	platyphylloside	OC[C@H]1O[C@@H](O[C@@H](CCC2=CC=C(O)C=C2)CC(=O)CCC2=CC=C(O)C=C2)[C@H](O)[C@@H](O)[C@@H]1O	0.517	0.482	0.708372	0.544988
28	4-hydroxy-Z-cinnamomic acid 4-B-D-glucopyranosyloxybenzyl ester	OC[C@@H]1OC(OCC(=O)OC2=CC=C(COC(=O)\C=C/C3=CC=C(O)C=C3)C=C2)[C@@H](O)[C@H](O)[C@H]1O	0.562	0.46	0.66482	0.544846
250	isovitexin-4′-O-glucoside	OC[C@H]1O[C@@H](O[C@H]2[C@H](O)[C@@H](O)[C@@H](O[C@@H]2CO)C2=C(O)C=C(O)C3=C2OC(=CC3=O)C2=CC=C(O)C=C2)[C@H](O)[C@@H](O)[C@@H]1O	0.541	0.403	0.803987	0.544675
71	5,7-Dihydroxy-4´-methoxyflavone (acacetin)	COC1=CC=C(C=C1)C1=CC(=O)C2=C(O1)C=C(O)C([C@@H]1OC(CO)[C@@H](O)[C@H](O)C1O)=C2O	0.512	0.646	0.417287	0.543295
103	(E)-2-hydroxy-3',6'-dimethoxychalcone	COC1=CC(C(=O)\C=C\C2=CC=CC=C2O)=C(OC)C=C1	0.713	0.469	0.362769	0.542583
291	4-(3,4-dihydroxybenzyl)-2-(3,4-dihydroxyphenyl)tetrahydrofuran-3-carboxy-O-β-D-glucopyranoside	OC[C@H]1O[C@@H](OC(=O)[C@H]2[C@@H](CC3=CC(O)=C(O)C=C3)CO[C@@H]2C2=CC(O)=C(O)C=C2)[C@H](O)[C@@H](O)[C@@H]1O	0.502	0.435	0.807918	0.542464
208	rosmarinic acid	OC(=O)C(CC1=CC=C(O)C(O)=C1)OC(=O)\C=C\C1=CC=C(O)C(O)=C1	0.541	0.525	0.574424	0.542062
234	Apigenin 7-O-(6´´-malonyl)-glucoside	O[C@H]1[C@H](O)[C@@H](COC(=O)CC(O)=O)O[C@@H](OC2=CC(O)=C3C(=O)C=C(OC3=C2)C2=CC=C(O)C=C2)[C@@H]1O	0.516	0.438	0.766854	0.540258
84	Butein chalcona	OC1=CC(O)=C(C=C1)C(=O)\C=C\C1=CC(O)=C(O)C=C1	0.581	0.573	0.403182	0.539316
51	isoetin 4´-O-glucoside	OCC1O[C@@H](OC2=C(O)C=C(C(O)=C2)C2=CC(=O)C3=C(O)C=C(O)C=C3O2)C(O)[C@@H](O)[C@@H]1O	0.523	0.574	0.506937	0.539248
194	Quercetagetin-O-acetyl hexoside	CC(=O)OC[C@H]1O[C@@H](OC2=C(OC3=CC(O)=CC(O)=C3C2=O)C2=CC(O)=C(O)C=C2)[C@H](O)[C@@H](O)[C@@H]1O	0.497	0.541	0.610131	0.538576
171	4-Acetyl-3-prenyl-p-coumaric acid	[H]C1=C(OC(C)=C)C(CC=C(C)C)=CC(\C=C\C(O)=O)=C1	0.468	0.643	0.479836	0.538282
221	Vicenin	OC[C@H]1O[C@H]([C@H](O)[C@@H](O)[C@@H]1O)C1=C(O)C([C@@H]2O[C@H](CO)[C@@H](O)[C@H](O)[C@H]2O)=C2OC(=CC(=O)C2=C1O)C1=CC=C(O)C=C1	0.525	0.488	0.648361	0.537454
281	Bidenoside G	CC(=O)OC[C@H]1O[C@@H](OC2=CC(O)=C(C=C2)C(=O)\C=C\C2=CC=C(O)C(O)=C2)[C@H](O)[C@@H](O)[C@@H]1O	0.566	0.451	0.638024	0.537133
145	specicoside	OC[C@@H]1O[C@@H](O[C@H]2OC=CC3[C@@H](OC(=O)\C=C\C4=CC=C(O)C=C4)[C@H]4O[C@@]4(CO)C23)[C@@H](O)[C@H](O)[C@@H]1O	0.474	0.493	0.730992	0.537123
18	1-Caffeoyl-3-feruloylquinic acid	COC1=C(O)C=CC(\C=C\C(=O)O[C@@H]2C[C@@](C[C@@H](O)[C@@H]2O)(OC(=O)\C=C\C2=CC=C(O)C(O)=C2)C(O)=O)=C1	0.549	0.409	0.741275	0.536555
224	Dihydromyricetin	O[C@@H]1[C@H](OC2=CC(O)=CC(O)=C2C1=O)C1=CC(O)=C(O)C(O)=C1	0.481	0.626	0.477985	0.536451
285	(7R,8S)-dihydrodehydrodiconiferyl alcohol 9-O-beta-D-glucopyranoside	COC1=CC(CCCO)=CC2=C1O[C@@H]([C@H]2CO[C@@H]1O[C@H](CO)[C@@H](O)[C@H](O)[C@H]1O)C1=CC(OC)=C(O)C=C1	0.463	0.418	0.879915	0.536064
38	apigenin 7-O-glucoside	OC[C@H]1O[C@@H](OC2=CC(O)=C3C(=O)C=C(OC3=C2)C2=CC=C(O)C=C2)[C@H](O)[C@@H](O)[C@@H]1O	0.505	0.546	0.57441	0.535927
66	cis-centcyamine	COC1=CC2=C(NC=C2CCNC(=O)\C=C/C2=CC=C(O)C=C2)C=C1	0.644	0.459	0.475629	0.535878
188	matairesinoside	[H]C1=C(OO[C@@H]2O[C@H](CO)[C@@H](O)[C@H](O)[C@H]2O)C(OC)=CC(C[C@]2([H])C(=O)OC[C@@]2([H])CC2=CC(OC)=C(O)C=C2)=C1	0.578	0.335	0.815505	0.535517
53	isoetin 7-O-glucoside	OCC1O[C@@H](OC2=CC(O)=C3C(=O)C=C(OC3=C2)C2=CC(O)=C(O)C=C2O)C(O)[C@@H](O)[C@@H]1O	0.528	0.524	0.56312	0.534074
174	4-Acetyl-3,5-diprenylcinnamic acid	CC(C)=CCC1=CC(\C=C\C(O)=O)=CC(CC=C(C)C)=C1OC(C)=C	0.48	0.544	0.614641	0.533983
46	luteolin 7-O-arabinoside	OC[C@H]1O[C@@H](OC2=CC(O)=C3C(=O)C=C(OC3=C2)C2=CC=C(O)C(O)=C2)[C@H](O)C1O	0.494	0.584	0.513258	0.533003
83	Rutin	C[C@@H]1O[C@@H](OC[C@H]2O[C@@H](OC3=C(OC4=CC(O)=CC(O)=C4C3=O)C3=CC(O)=C(O)C=C3)[C@H](O)[C@@H](O)[C@@H]2O)[C@H](O)[C@H](O)[C@H]1O	0.539	0.372	0.79554	0.530055
267	quercetin-3-O-β-galactoside	[H][C@@]1(CO)O[C@]([H])(OC2=C(OC3=C(C(O)=CC(O)=C3)C2=O)C2=CC=C(O)C(O)=C2)[C@@]([H])(O)[C@]([H])(O)[C@]1([H])O	0.487	0.526	0.608718	0.528505
227	quercitrin	C[C@@H]1O[C@@H](OC2=C(OC3=CC(O)=CC(O)=C3C2=O)C2=CC(O)=C(O)C=C2)[C@H](O)[C@@H](O)[C@H]1O	0.481	0.554	0.56022	0.526438
8	(-) L-chicoric acid	OC(=O)C(OC(=O)C=CC1=CC(O)=C(O)C=C1)C(OC(=O)C=CC1=CC(O)=C(O)C=C1)C(O)=O	0.499	0.419	0.738469	0.520013
151	luteolin-7-O-glucoside	[H]C1=C(O[C@@H]2O[C@H](CO)[C@@H](O)[C@H](O)[C@H]2O)C=C2OC(=C([H])C(=O)C2=C1O)C1=CC=C(O)C(O)=C1	0.501	0.492	0.599085	0.518803
239	Bonducillin	COC1=CC=C(\C=C2/COC3=C(C=CC(O)=C3)C2=O)C=C1	0.603	0.519	0.364621	0.518766
279	3,5-dihydroxy_x0002_6,7,8,3´,4´,5´-hexamethoxyflavone	OC1=CC(=CC(O)=C1O)C1=C(O)C(=O)C2=C(O)C(O)=C(O)C(O)=C2O1	0.477	0.532	0.56952	0.51836
30	skimmin	OC[C@H]1O[C@@H](OC2=CC3=C(C=CC(=O)O3)C=C2)[C@H](O)[C@@H](O)[C@@H]1O	0.496	0.559	0.481987	0.517336
225	Baicalin	O[C@@H]1[C@@H](O)[C@H](OC2=C(O)C(O)=C3C(=O)C=C(OC3=C2)C2=CC=CC=C2)O[C@@H]([C@H]1O)C(O)=O	0.522	0.466	0.592976	0.515734
280	chalconaringenin	OC1=CC=C(\C=C\C(=O)C2=C(O)C=C(O)C=C2O)C=C1	0.583	0.534	0.349722	0.513416
156	Quercetin 3-O-(6-O-malonyl)-β-D-glucoside	O[C@H]1[C@H](O)[C@@H](COC(=O)CC(O)=O)O[C@@H](OC2=C(OC3=CC(O)=CC(O)=C3C2=O)C2=CC(O)=C(O)C=C2)[C@@H]1O	0.497	0.435	0.679022	0.512511
193	N-(p-coumaroyl)-serotonin	[H]N(CCC1=CN([H])C2=CC=C(O)C=C12)C(=O)\C=C\C1=CC=C(O)C([H])=C1	0.607	0.435	0.469954	0.510706
258	Guayulin-A	C\C1=C/C2C(C(C\C(C)=C\CC1)OC(=O)\C=C\C1=CC=CC=C1)C2(C)C	0.526	0.496	0.502465	0.509284
161	Apigenin-8-C-glycoside	C[Si](C)(C)OCC1OC(C(O[Si](C)(C)C)C(O[Si](C)(C)C)C1O[Si](C)(C)C)C1=C(O[Si](C)(C)C)C=C(O[Si](C)(C)C)C2=C1OC(=CC2=O)C1=CC=C(O[Si](C)(C)C)C=C1	0.516	0.428	0.634724	0.507714
284	sesamin	C1OC2=C(O1)C=C(C=C2)[C@H]1OC[C@H]2[C@@H]1CO[C@@H]2C1=CC2=C(OCO2)C=C1	0.398	0.617	0.50059	0.505002
163	Coumaroyltartaric acid	OC(C(O)C(=O)OC(=O)\C=C\C1=CC=C(O)C=C1)C(O)=O	0.492	0.518	0.500714	0.503951
247	5-Caffeoylshikimic acid	[H]\C(=C(\[H])C1=CC(O)=C(O)C=C1)C(=O)O[C@@H]1CC(=C[C@@H](O)[C@H]1O)C(O)=O	0.509	0.492	0.514669	0.503652
31	cichoriin	OC[C@H]1O[C@@H](OC2=C(O)C=C3C=CC(=O)OC3=C2)[C@H](O)[C@@H](O)[C@@H]1O	0.487	0.521	0.49674	0.50227
154	Kaempferol-3-O-glucopyranoside	OC[C@@H]1O[C@@H](OC2=C(OC3=CC(O)=CC(O)=C3C2=O)C2=CC=C(O)C=C2)[C@@H](O)[C@H](O)[C@H]1O	0.502	0.467	0.564793	0.502084
199	Hesperetin	COC1=C(O)C=C(C=C1)[C@@H]1CC(=O)C2=C(O)C=C(O)C=C2O1	0.503	0.527	0.444039	0.499491
10	D-Chicoric acid	OC(=O)[C@@H](OC(=O)\C=C\C1=CC(O)=C(O)C=C1)[C@H](OC(=O)\C=C\C1=CC(O)=C(O)C=C1)C(O)=O	0.499	0.442	0.599475	0.498749
248	4-Caffeoylshikimic acid	O[C@@H]1CC(=C[C@@H](O)[C@H]1OC(=O)\C=C\C1=CC(O)=C(O)C=C1)C(O)=O	0.504	0.477	0.526032	0.498334
202	Cordoin	[H]CC(C)=CCOC1=CC=C(C(=O)\C=C\C2=CC=C([H])C=C2)C(O)=C1	0.644	0.412	0.38498	0.49802
197	Taxifoline-O-pentoside	[H]C1(COC([H])(O)C([H])(O)C1O)OC1C(OC2=C(C(O)=CC(O)=C2)C1=O)C1=CC(O)=C(O)C=C1	0.476	0.432	0.655865	0.498008
139	Hyperoside	OC[C@@H]1OC(OC2=C(OC3=CC(O)=CC(O)=C3C2=O)C2=CC=C(O)C(O)=C2)[C@@H](O)[C@H](O)[C@@H]1O	0.487	0.44	0.61909	0.497479
222	Salipurposid	OC[C@H]1O[C@@H](OC2=CC(O)=CC3=C2C(=O)CC(O3)C2=CC=C(O)C=C2)[C@H](O)[C@@H](O)[C@@H]1O	0.465	0.533	0.490213	0.496783
256	3-[4′-acetoxyprenyl]-5-[4″-hydroxyprenyl]-7(E)-p-coumaric acid	CC(=O)OC\C(C)=C/CC1=C(O)C(C\C=C(\C)CO)=CC(\C=C\C(O)=O)=C1	0.409	0.509	0.631927	0.496072
185	taxifoline-O-pentoside	C[C@H]1[C@H](C)[C@H](OC2=C(O)C=CC(=C2)[C@H]2OC3=C(C(O)=CC(O)=C3)C(=O)[C@@H]2O)O[C@@H]1CO	0.455	0.471	0.613727	0.495637
143	vitexin	OC[C@H]1O[C@H]([C@H](O)[C@@H](O)[C@@H]1O)C1=C(O)C=C(O)C2=C1OC(=CC2=O)C1=CC=C(O)C=C1	0.507	0.451	0.54675	0.493958
142	homoorientin	OC[C@H]1O[C@H]([C@H](O)[C@@H](O)[C@@H]1O)C1=C(O)C2=C(OC(=CC2=O)C2=CC(O)=C(O)C=C2)C=C1O	0.522	0.48	0.466997	0.493812
23	Caffeoyltartaric acid	O[C@H]([C@@H](OC(=O)\C=C\C1=CC(O)=C(O)C=C1)C(O)=O)C(O)=O	0.54	0.419	0.542236	0.493666
141	orientin	OC[C@H]1O[C@H]([C@H](O)[C@@H](O)[C@@H]1O)C1=C(O)C=C(O)C2=C1OC(=CC2=O)C1=CC(O)=C(O)C=C1	0.515	0.413	0.593842	0.492642
201	Quercetin-di-methyl ether	COC1=C(O)C=CC(=C1)C1=C(OC)C(=O)C2=C(O)C=C(O)C=C2O1	0.356	0.671	0.423188	0.492465
238	melacacidin	O[C@@H]1[C@H](O)C2=C(O[C@@H]1C1=CC(O)=C(O)C=C1)C(O)=C(O)C=C2	0.453	0.546	0.468229	0.49229
92	7-O-B-D-Glucopyranosyl- nutanocoumarin	C[C@H]1OC2=C(C(=O)OC3=CC(O[C@@H]4O[C@H](CO)[C@@H](O)[C@H](O)[C@H]4O)=CC(C)=C23)[C@]1(C)CC\C=C(\C)CO	0.469	0.404	0.691283	0.492088
5	trans-5-O-caffeoylquinic acid	O[C@@H]1C[C@@](O)(C[C@@H](OC(=O)\C=C\C2=CC(O)=C(O)C=C2)[C@H]1O)C(O)=O	0.47	0.48	0.550985	0.491444
7	caftaric acid	O[C@H]([C@@H](OC(=O)\C=C\C1=CC=C(O)C(O)=C1)C(O)=O)C(O)=O	0.54	0.426	0.513101	0.490052
158	artepillin C	CC(C)=CCC1=CC(\C=C\C(C)=O)=CC(CC=C(C)C)=C1O	0.465	0.499	0.51901	0.489877
22	Caffeoylshikimic acid	O[C@@H]1C=C(C[C@@H](OC(=O)\C=C\C2=CC(O)=C(O)C=C2)[C@@H]1O)C(O)=O	0.509	0.491	0.44881	0.488973
57	quercetin 3-O-glucoside (isoquercetin)	OC[C@H]1O[C@@H](OC2=C(OC3=CC(O)=CC(O)=C3C2=O)C2=CC(O)=C(O)C=C2)[C@H](O)[C@@H](O)[C@@H]1O	0.487	0.43	0.591062	0.487528
226	glycoside guaijaverin	O[C@H]1CO[C@@H](OC2=C(OC3=CC(O)=CC(O)=C3C2=O)C2=CC(O)=C(O)C=C2)[C@H](O)[C@H]1O	0.479	0.453	0.562463	0.487052
266	tamarixetin-3-O_x0002_β-galactoside	[H][C@@]1(CO)O[C@]([H])(OC2=C(OC3=C(C(O)=CC(O)=C3)C2=O)C2=CC=C(OC)C(O)=C2)[C@@]([H])(O)[C@](C)(O)[C@]1([H])O	0.483	0.441	0.571721	0.486002
255	capillartemisin B	CC(C)=CCC1=C(O)C(C\C=C(\C)CO)=CC(\C=C\C(O)=O)=C1	0.361	0.572	0.55986	0.485799
207	N-di-p-coumaroylputrescine	OC1=CC=C(\C=C/C(=O)NCCCCNC(=O)\C=C/C2=CC=C(O)C=C2)C=C1	0.493	0.477	0.488212	0.48577
144	isoschaftoside	OC[C@H]1O[C@H]([C@H](O)[C@@H](O)[C@@H]1O)C1=C2OC(=CC(=O)C2=C(O)C([C@@H]2OC[C@H](O)[C@H](O)[C@H]2O)=C1O)C1=CC=C(O)C=C1	0.535	0.393	0.556297	0.484677
9	Chlorogenic acid	O[C@@H]1C[C@](O)(C[C@@H](OC(=O)\C=C\C2=CC(O)=C(O)C=C2)[C@@H]1O)C(O)=O	0.47	0.489	0.503497	0.484621
160	isosakuranetin	COC1=CC=C(C=C1)[C@@H]1CC(=O)C2=C(O)C=C(O)C=C2O1	0.459	0.539	0.434061	0.484543
311	Balanophonin	COC1=CC(\C=C\C=O)=CC2=C1O[C@@H]([C@H]2CO)C1=CC(OC)=C(O)C=C1	0.435	0.51	0.528597	0.484332
304	Hinoquinin	O=C1OC[C@H](CC2=CC3=C(OCO3)C=C2)[C@H]1CC1=CC2=C(OCO2)C=C1	0.378	0.546	0.566303	0.48387
12	4-Caffeoylquinic acid (Cryptochlorogenic acid)	O[C@@H]1CC(O)(C[C@@H](O)C1OC(=O)\C=C\C1=CC(O)=C(O)C=C1)C(O)=O	0.467	0.481	0.518602	0.483615
128	3`4`-dimethylether eriodictyol	COC1=C(O)C=CC(=C1)[C@@H]1CC(=O)C2=C(O1)C=C(O)C=C2O	0.5	0.491	0.439703	0.483432
86	α-hydroxy-butein	O\C(=C/C1=CC(O)=C(O)C=C1)C(=O)C1=CC=C(O)C=C1O	0.54	0.477	0.390076	0.483088
124	eriodictyol	OC1=CC(O)=C2C(=O)C[C@H](OC2=C1)C1=CC(O)=C(O)C=C1	0.517	0.476	0.430944	0.48246
45	luteolin 3´-O-methyl ether	COC1=CC(=CC=C1O)C1=CC(=O)C2=C(O)C=C(O)C=C2O1	0.472	0.518	0.436589	0.482114
50	isoetin	OC1=CC(O)=C2C(=O)C=C(OC2=C1)C1=CC(O)=C(O)C=C1O	0.531	0.462	0.425587	0.481425
130	luteolin-7,3`-dimethylether	COC1=C(O)C=CC(=C1)C1=CC(=O)C2=C(O1)C=C(O)C=C2O	0.472	0.525	0.420102	0.481245
65	cis-3-O-p-coumaroylquinic acid	O[C@@H]1C[C@@](O)(C[C@@H](OC(=O)\C=C\C2=CC=C(O)C=C2)[C@H]1O)C(O)=O	0.46	0.485	0.512475	0.481061
196	Eriodyctiol	OC1=CC(O)=C2C(=O)C[C@@H](OC2=C1)C1=CC(O)=C(O)C=C1	0.517	0.472	0.430782	0.480877
191	thujaplicatin methyl ether	[H][C@@]1(CC2=CC(OC)=C(O)C=C2)COC(=O)[C@@]1([H])CC1=CC(OC)=C(O)C(OC)=C1	0.339	0.571	0.578089	0.480655
14	4-Feruloylquinic acid	COC1=C(O)C=CC(\C=C\C(=O)OC2[C@H](O)CC(O)(C[C@H]2O)C(O)=O)=C1	0.445	0.488	0.532617	0.480652
294	(7S,8R,8′R)-7-(3,4-di_x0002_hydroxyphenyl)-3′,4′-dihydroxy-8'-(hydroxymethyl)-7,8,7′,8′-tetra_x0002_hydronaphthalen-8-carboxylic acid	OC[C@@H]1CC2=C(C=C(O)C(O)=C2)[C@@H]([C@H]1C(O)=O)C1=CC(O)=C(O)C=C1	0.437	0.491	0.536141	0.479409
127	3`-mono-eriodictyol	OC1=CC2=C(C(=O)C[C@H](O2)C2=CC(O)=C(O)C=C2)C(O)=C1	0.517	0.461	0.442395	0.479141
198	Quercetagetin	OC1=CC2=C(C(O)=C1O)C(=O)C(O)=C(O2)C1=CC(O)=C(O)C=C1	0.472	0.504	0.447383	0.47904
88	quercetin 3-O-glucopyranosyl	OC[C@@H]1O[C@H](OC2=C(OC3=CC(O)=CC(O)=C3C2=O)C2=CC=C(O)C(O)=C2)[C@@H](O)[C@H](O)[C@H]1O	0.487	0.422	0.560008	0.477693
214	isovitexin	OC[C@H]1O[C@H]([C@H](O)[C@@H](O)[C@@H]1O)C1=C(O)C2=C(OC(=CC2=O)C2=CC=C(O)C=C2)C=C1O	0.512	0.482	0.403246	0.476791
41	luteolin 4´-O-methyl ether	COC1=CC=C(C=C1O)C1=CC(=O)C2=C(O1)C=C(O)C=C2O	0.474	0.51	0.422479	0.476749
223	Dihydroquercetin	OC1C(OC2=CC(O)=CC(O)=C2C1=O)C1=CC(O)=C(O)C=C1	0.484	0.484	0.448331	0.476259
72	3,7,4´-trihydroxyflavanone (garbanzol)	O[C@@H]1[C@H](OC2=C(C=CC(O)=C2)C1=O)C1=CC=C(O)C=C1	0.459	0.549	0.373854	0.475346
205	auraptene	[H]C1=C2OC(=O)C=CC2=CC=C1OC\C=C(/C)CCCC(C)=C	0.494	0.484	0.419309	0.473922
40	Luteolin	OC1=CC(O)=C2C(=O)C=C(OC2=C1)C1=CC(O)=C(O)C=C1	0.506	0.472	0.412964	0.472654
24	Caffeoyl–feruloyltartaric acid	COC1=C(O)C=CC(\C=C\C(=O)C(O)(C(O)=O)C(O)(C(O)=O)C(=O)\C=C\C2=CC(O)=C(O)C=C2)=C1	0.509	0.393	0.546571	0.472269
117	fertaric acid	COC1=C(O)C=CC(\C=C\C(=O)OC(C(O)C(O)=O)C(O)=O)=C1	0.5	0.438	0.482718	0.472259
11	1-Caffeoylquinic acid	O[C@@H]1CC(C[C@@H](O)C1O)(OC(=O)\C=C\C1=CC(O)=C(O)C=C1)C(O)=O	0.464	0.47	0.490712	0.472119
268	Taxifolin	O[C@@H]1[C@H](OC2=CC(O)=CC(O)=C2C1=O)C1=CC(O)=C(O)C=C1	0.484	0.468	0.452532	0.47098
136	6-hydroxyluteolin	OC1=C(O)C=C(C=C1)C1=CC(=O)C2=C(O)C(O)=C(O)C=C2O1	0.496	0.458	0.447247	0.470716
64	trans-3-O-p-coumaroylquinic acid	O[C@H]1C[C@@](O)(C[C@H](OC(=O)\C=C\C2=CC=C(O)C=C2)[C@H]1O)C(O)=O	0.46	0.489	0.45174	0.469429
200	Chrysoeriol	COC1=C(O)C=CC(=C1)C1=CC(=O)C2=C(O)C=C(O)C=C2O1	0.472	0.484	0.438389	0.469349
95	4-O-p-Coumaroylquinic acid	O[C@@H]1CC(O)(C[C@@H](O)C1OC(=O)\C=C\C1=CC=C(O)C=C1)C(O)=O	0.457	0.486	0.459424	0.468747
13	3-Feruloylquinic acid	COC1=C(O)C=CC(\C=C\C(=O)O[C@@H]2C[C@](O)(C[C@@H](O)[C@@H]2O)C(O)=O)=C1	0.443	0.489	0.476831	0.468141
172	4-Acetyl-3-prenyl-ethoxycinnamate	[H]C1=C(OC(C)=C)C(CC=C(C)C)=CC(\C=C\C(=O)OCC)=C1	0.465	0.464	0.472025	0.466138
152	Patuletin-7-O-glucoside	COC1=C(O[C@@H]2O[C@H](CO)[C@@H](O)[C@H](O)[C@H]2O)C=C2OC(=C(O)C(=O)C2=C1O)C1=CC=C(O)C(O)=C1	0.495	0.322	0.666943	0.465374
272	mearnsetin	COC1=C(O)C=C(C=C1O)C1=C(O)C(=O)C2=C(O)C=C(O)C=C2O1	0.433	0.507	0.443617	0.463937
116	coutaric acid	OC(C(OC(=O)\C=C\C1=CC=C(O)C=C1)C(O)=O)C(O)=O	0.51	0.423	0.449842	0.463281
121	Myricetin	OC1=CC(O)=C2C(OC(=C(O)C2=O)C2=CC(O)=C(O)C(O)=C2)=C1	0.472	0.452	0.462646	0.462231
259	dihydrokaempferide	COC1=CC=C(C=C1)C1OC2=CC(O)=CC(O)=C2C(=O)C1O	0.448	0.481	0.449004	0.460987
278	5,6,7-trihydroxy-4´-methoxyflavone	COC1=CC=C(C=C1)C1=CC(=O)C2=C(O1)C=C(O)C(O)=C2O	0.458	0.486	0.417078	0.459953
173	3,5-Diprenyl-4-hydroxycinnamic acid	CC(C)=CCC1=CC(\C=C\C(O)=O)=CC(CC=C(C)C)=C1O	0.417	0.474	0.512447	0.459769
15	5-p-Coumaroylquinic acid	O[C@@H]1C[C@](O)(C[C@@H](OC(=O)\C=C\C2=CC=C(O)C=C2)[C@@H]1O)C(O)=O	0.46	0.486	0.411576	0.459552
245	3-O-methylquercetin	[H]C1=C(O)C=C(C=C1)C1=C(OC)C(=O)C2=C(O)C([H])=C(O)C(O)=C2O1	0.395	0.51	0.478656	0.457652
175	3-Prenyl-4-(4_x0002_ -hydroxydihydrocinnamoyloxy)-cinnamate	CC(C)=CCC1=CC(\C=C\C(O)=O)=CC=C1OC(=O)CCC1=CC=C(O)C=C1	0.523	0.309	0.597824	0.456434
179	5,7,4_x0002_ -Trihydroxy-6-methoxyflavone	[H]C1=C(O)C=CC(=C1)C1=C([H])C(=O)C2=C(O1)C([H])=C(O)C(OC)=C2O	0.42	0.53	0.386802	0.455359
217	Z-2-β-d-glucopyranosyloxy-4-methoxycinnamic acid	COC1=CC(O[C@H]2O[C@@H](CO)[C@H](O)[C@@H](O)[C@@H]2O)=C(\C=C\C(O)=O)C=C1	0.421	0.435	0.552354	0.454923
100	(S)-2',5,7,-trihydroxyflavanone	[H][C@@]1(CC(=O)C2=C(O)C=C(O)C=C2O1)C1=CC=CC=C1O	0.503	0.456	0.364908	0.454846
33	apigenin	OC1=CC=C(C=C1)C1=CC(=O)C2=C(O)C=C(O)C=C2O1	0.496	0.476	0.338421	0.454064
218	E-2-β-d-glucopyranosyloxy-4-methoxycinnamic acid	COC1=CC(O[C@H]2O[C@@H](CO)[C@H](O)[C@@H](O)[C@@H]2O)=C(\C=C/C(O)=O)C=C1	0.421	0.418	0.578526	0.454025
240	4,6-dihydroxy-3-[3′-methyl-2′-butenyl]-5-[4″-hydroxy-3″-methyl-2″-butenyl]-cinnamic acid	CC(C)=CCC1=C(O)C(C\C=C(/C)CO)=C(O)C(\C=C\C(O)=O)=C1	0.356	0.463	0.609753	0.45247
301	β-methylcubebin	[H][C@]1(CC2=CC3=C(OCO3)C=C2)CO[C@H](OC)[C@]1([H])CC1=CC2=C(OCO2)C=C1	0.396	0.491	0.485927	0.452274
249	3-Caffeoylshikimic acid	O[C@@H]1CC(=C[C@@H](OC(=O)\C=C\C2=CC(O)=C(O)C=C2)[C@H]1O)C(O)=O	0.508	0.375	0.487486	0.452086
122	hispidulin	COC1=C(O)C2=C(OC(=CC2=O)C2=CC=C(O)C=C2)C=C1O	0.42	0.522	0.380304	0.450853
126	Eupafolin	COC1=C(O)C2=C(OC(=CC2=O)C2=CC(O)=C(O)C=C2)C=C1O	0.437	0.475	0.428603	0.449881
55	quercetin	OC1=CC(O)=C2C(OC(=C(O)C2=O)C2=CC(O)=C(O)C=C2)=C1	0.463	0.463	0.402489	0.449868
167	Daphnin	OC[C@H]1O[C@@H](OC2=C(O)C3=C(C=CC(=O)O3)C=C2)[C@H](O)[C@@H](O)[C@@H]1O	0.492	0.346	0.558023	0.449835
90	Pinostrobin chalcone	COC1=CC(O)=C(C(=O)\C=C\C2=CC=CC=C2)C(O)=C1	0.494	0.467	0.332609	0.448529
209	Aromadendrin	O[C@@H]1[C@H](OC2=CC(O)=CC(O)=C2C1=O)C1=CC=C(O)C=C1	0.464	0.452	0.414089	0.448525
277	4´-methyl ether of gossypetin	COC1=C(O)C=C(C=C1)C1=C(O)C(=O)C2=C(O1)C(O)=C(O)C=C2O	0.437	0.438	0.484792	0.447759
81	Patuletin	COC1=C(O)C2=C(OC(=C(O)C2=O)C2=CC(O)=C(O)C=C2)C=C1O	0.439	0.457	0.446824	0.447663
74	Naringenin	OC1=CC=C(C=C1)C1CC(=O)C2=C(O)C=C(O)C=C2O1	0.488	0.433	0.398239	0.447239
231	Techtochrysin	COC1=CC(O)=C2C(=O)C=C(OC2=C1)C1=CC=CC=C1	0.399	0.541	0.365445	0.446663
296	Diasesartemin	COC1=CC(=CC2=C1OCO2)[C@@H]1OC[C@H]2[C@@H]1CO[C@H]2C1=CC(OC)=C(OC)C(OC)=C1	0.396	0.423	0.581204	0.446639
244	pinobanksin	O[C@@H]1C(OC2=CC(O)=CC(O)=C2C1=O)C1=CC=CC=C1	0.424	0.498	0.393013	0.445909
254	capillartemisin A	CC(C)=CCC1=C(O)C(C\C=C(/C)CO)=CC(\C=C\C(O)=O)=C1	0.361	0.497	0.505275	0.444933
236	Fisetin hydrate	OC1=CC2=C(C=C1)C(=O)C(O)=C(O2)C1=CC(O)=C(O)C=C1	0.504	0.419	0.377293	0.443613
125	5,6,7-trihydroxy-40 -methoxyflavanone	COC1=CC=C(C=C1)C1=C(O)C(=O)C2=C(O1)C=C(O)C(O)=C2O	0.418	0.479	0.419672	0.441966
115	1-methyl-2-phenylethyl isoferulate	COC1=CC(\C=C\C(=O)OCCC2=CC=CC=C2)=CC=C1O	0.459	0.426	0.42831	0.439571
289	fargesin	COC1=C(OC)C=C(C=C1)[C@@H]1OC[C@H]2[C@@H]1CO[C@@H]2C1=CC2=C(OCO2)C=C1	0.387	0.439	0.533492	0.438911
286	epieudesmin	COC1=C(OC)C=C(C=C1)[C@H]1OC[C@H]2[C@@H]1CO[C@H]2C1=CC(OC)=C(OC)C=C1	0.407	0.409	0.547531	0.438271
261	violanone	CCC1=C(O)C(OC)=C(C=C1)C1COC2=C(C=CC(O)=C2)C1=O	0.362	0.512	0.44499	0.43805
300	α-methylcubebin	[H][C@]1(CC2=CC3=C(OCO3)C=C2)CO[C@@H](OC)[C@]1([H])CC1=CC2=C(OCO2)C=C1	0.396	0.442	0.505477	0.437557
299	β-cubebin	[H][C@]1(CC2=CC3=C(OCO3)C=C2)CO[C@H](O)[C@]1([H])CC1=CC2=C(OCO2)C=C1	0.403	0.441	0.492626	0.437154
310	trachelogenin	COC1=C(O)C=CC(C[C@]2(O)[C@@H](CC3=CC(OC)=C(OC)C=C3)COC2=O)=C1	0.366	0.501	0.450281	0.436526
70	5,4´-Dihydroxy-7-methoxyflavone	COC1=CC(O)=C2C(=O)C=C(OC2=C1)C1=CC=C(O)C=C1	0.418	0.49	0.369183	0.435265
211	(E)-3-(4-(3-methylbut-2-enyloxy)-3,5-dime-thoxyphenyl)acrylaldehyde	[H]C(=O)\C=C\C1=CC(OC)=C(OCCC(C)=C)C(OC)=C1	0.311	0.537	0.475577	0.434163
118	caftaric acid glycoside	OCC1OC(OC2=C(O)C=C(\C=C\C(=O)OC(C(O)C(O)=O)C(O)=O)C=C2)C(O)C(O)C1O	0.452	0.309	0.624549	0.434114
265	biochanin A	[H]OC1=CC(O[H])=C2C(=O)C(=COC2=C1)C1=CC=C(OC)C=C1	0.414	0.508	0.331916	0.432559
263	drupanin	CC(C)=CCC1=C(O)C=CC(\C=C\C(O)=O)=C1	0.394	0.48	0.417197	0.432311
137	Rhamnetin	COC1=CC(O)=C2C(=O)C(O)=C(OC2=C1)C1=CC=C(O)C(O)=C1	0.411	0.467	0.408903	0.432213
293	7-(3,4-dihydroxyphenyl)-3′,4′-dihy_x0002_droxy-7,8,7′,8′-tetrahydronaphtho [8,8′-c]furan-1(3H)-one	OC1=CC2=C(C=C1O)[C@@H]([C@@H]1[C@H](COC1=O)C2)C1=CC(O)=C(O)C=C1	0.398	0.411	0.531904	0.432089
69	Chrysin	OC1=CC(O)=C2C(=O)C=C(OC2=C1)C1=CC=CC=C1	0.441	0.468	0.350902	0.431895
212	nelumal A	[H]C(=O)\C=C\C1=CC(OC)=C(OC\C([H])=C(/C)CCC=C(C)C)C(OC)=C1	0.42	0.352	0.592871	0.431204
159	aromaden-drin-4′-methyl ether	COC1=CC=C(C=C1)C1OC2=CC(OC3OC(C)C(O)C(O)C3O)=CC(O)=C2C(=O)C1O	0.454	0.324	0.580713	0.431197
77	Pinobanksin	O[C@@H]1[C@H](OC2=CC(O)=CC(O)=C2C1=O)C1=CC=CC=C1	0.424	0.454	0.393418	0.428971
107	5,7-dihydroxy-4´-methoxyflavone	COC1=CC=C(C=C1)C1=CC(=O)C2=C(O)C=C(O)C=C2O1	0.444	0.423	0.41174	0.428874
148	4-hydroxylonchocarpin	CC1(C)OC2=C(C=C1)C(O)=C(C=C2)C(=O)\C=C\C1=CC=C(O)C=C1	0.487	0.385	0.394471	0.427453
264	vestitone	COC1=CC(O)=C(C=C1)[C@@H]1COC2=C(C=CC(O)=C2)C1=O	0.46	0.439	0.344932	0.426903
276	6-hydroxy-3´,4´,5´- trimethoxyflavone	COC1=CC(OC)=C(OC)C(=C1)C1=CC(=O)C2=C(O1)C=CC(O)=C2	0.387	0.489	0.385096	0.426054
56	quercetin 3´-methyl ether (isorhamnetin)	COC1=C(O)C=CC(=C1)C1=C(O)C(=O)C2=C(O)C=C(O)C=C2O1	0.433	0.419	0.421385	0.425062
230	3,4-dimethoxy cinnamic acid	COC1=C(OC)C=C(\C=C\C(O)=O)C=C1	0.323	0.573	0.344164	0.424327
104	(S)-4',5-dihydroxy-7-methoxyflavanone (sakuranetin)	COC1=CC(O)=C2C(=O)CC(OC2=C1)C1=CC=C(O)C=C1	0.439	0.427	0.388681	0.423437
54	kaempferol 3´-methyl ether	COC1=C(OC2=CC(O)=CC(O)=C2C1=O)C1=CC=C(O)C=C1	0.376	0.495	0.378977	0.422691
290	sesartemin	COC1=CC(=CC2=C1OCO2)[C@H]1OC[C@H]2[C@@H]1CO[C@@H]2C1=CC(OC)=C(OC)C(OC)=C1	0.396	0.452	0.416144	0.42204
178	5-Desmethyltangeretin	[H]C1=C(OC)C=CC(=C1)C1=C([H])C(=O)C2=C(O1)C(OC)=C(OC)C(OC)=C2O	0.36	0.509	0.378418	0.42165
180	5,7,4_x0002_ -Trihydroxy-6,3_x0002_ -dimethoxyflavone	[H]C1=C(OC2=C(C(O)=C(OC)C(O)=C2[H])C1=O)C1=CC(OC)=C(O)C=C1	0.359	0.476	0.437594	0.421327
134	luteolin-7,3`,4`-trimethylether	COC1=CC2=C(C(O)=C1)C(=O)C=C(O2)C1=CC(OC)=C(OC)C=C1	0.367	0.463	0.430356	0.417895
80	Resokaempferol	OC1=CC=C(C=C1)C1=C(O)C(=O)C2=C(O1)C=C(O)C=C2	0.465	0.419	0.328679	0.417617
303	β-methylclusin	[H][C@]1(CC2=CC3=C(OCO3)C=C2)CO[C@H](OC)[C@]1([H])CC1=CC(OC)=C(OC)C(OC)=C1	0.381	0.409	0.490856	0.415675
210	Ellagic acid	OC1=C(O)C2=C3C(=C1)C(=O)OC1=C3C(=CC(O)=C1O)C(=O)O2	0.513	0.322	0.404713	0.415596
131	quercetin7,3`-dimethylether	COC1=CC2=C(C(O)=C1)C(=O)C=C(O2)C1=CC(OC)=C(O)C=C1	0.374	0.461	0.4101	0.415498
162	Dihydroxy-dimethoxyflavone	COC1=C(OC)C=C(C=C1)C1=CC(=O)C2=C(O)C=C(O)C=C2O1	0.395	0.428	0.429344	0.415222
298	α-cubebin	[H][C@]1(CC2=CC3=C(OCO3)C=C2)CO[C@@H](O)[C@]1([H])CC1=CC2=C(OCO2)C=C1	0.403	0.387	0.484883	0.414579
275	6-hydroxy-2´,4´,5´-trimethoxyflavone	COC1=C(OC)C(=C(OC)C=C1)C1=CC(=O)C2=C(O1)C=CC(O)=C2	0.36	0.471	0.411344	0.414092
79	Kaempferol	OC1=CC=C(C=C1)C1=C(O)C(=O)C2=C(O)C=C(O)C=C2O1	0.443	0.416	0.355749	0.413618
219	Pilloin	COC1=CC(O)=C2C(=O)C=C(OC2=C1)C1=CC(O)=C(OC)C=C1	0.39	0.413	0.448756	0.41165
302	α-methylclusin	[H][C@]1(CC2=CC3=C(OCO3)C=C2)CO[C@@H](OC)[C@]1([H])CC1=CC(OC)=C(OC)C(OC)=C1	0.381	0.388	0.507151	0.411085
76	Pinostrobin	COC1=CC(O)=C2C(=O)C[C@H](OC2=C1)C1=CC=CC=C1	0.412	0.425	0.380693	0.410236
132	taxifolin-3`-methylether	COC1=CC2=C(C(O)=C1)C(=O)C(O)=C(O2)C1=CC(OC)=C(O)C=C1	0.373	0.423	0.453169	0.409745
271	cirsiliol	COC1=C(OC)C(O)=C2C(=O)C=C(OC2=C1)C1=CC(O)=C(O)C=C1	0.366	0.452	0.411794	0.409214
184	Nivetin	COC1=CC=C(C=C1)C1=CC(=O)OC2=C1C(O)=CC(O)=C2	0.377	0.472	0.352336	0.408406
297	Epiyangambin	COC1=CC(=CC(OC)=C1OC)[C@H]1OC[C@H]2[C@@H]1CO[C@H]2C1=CC(OC)=C(OC)C(OC)=C1	0.429	0.38	0.419867	0.408058
102	(S)-5-hydroxy-7-methoxyflavanone	COC1=CC(O)=C2C(=O)CC(OC2=C1)C1=CC=CC=C1	0.412	0.425	0.360502	0.405854
149	kanzonol B	CC1(C)CCC2=CC(\C=C\C(=O)C3=C(O)C=C(O)C=C3)=CC=C2O1	0.438	0.382	0.389678	0.405845
177	Nevadensin	[H]C1=C(OC)C=CC(=C1)C1=C([H])C(=O)C2=C(O1)C(OC)=C(O)C(OC)=C2O	0.342	0.464	0.414491	0.404938
129	luteolin-3`-mono	COC1=C(OC)C=C(C=C1)C1=CC(=O)C2=C(O1)C=C(O)C=C2O	0.395	0.408	0.414815	0.40433
270	eupatorin	COC1=C(O)C=C(C=C1)C1=CC(=O)C2=C(O)C(OC)=C(OC)C=C2O1	0.339	0.461	0.422342	0.404293
78	Galangin	OC1=CC(O)=C2C(OC(=C(O)C2=O)C2=CC=CC=C2)=C1	0.435	0.409	0.328393	0.401804
98	(E)-2',4'-dihydroxychalcone	OC1=CC(O)=C(C=C1)C(=O)CCC1=CC=CC=C1	0.405	0.434	0.338258	0.401737
36	apigenin 7,4´-O-dimethyl ether	COC1=CC=C(C=C1)C1=CC(=O)C2=C(O)C=C(OC)C=C2O1	0.375	0.435	0.390707	0.401625
273	axillarin	COC1=C(O)C=C2OC(=C(OC)C(=O)C2=C1O)C1=CC(O)=C(O)C(O)=C1	0.428	0.322	0.494691	0.401458
260	pratensein	COC1=C(O)C=C(C=C1)C1=COC2=CC(O)=CC(O)=C2C1=O	0.431	0.377	0.378803	0.398778
101	(S)-5,7-dihydroxy-2'-methoxyflavanone	COC1=C(C=CC=C1)C1CC(=O)C2=C(O)C=C(O)C=C2O1	0.456	0.33	0.409906	0.397243
114	methyl ferulic acid prenyl ester	COC1=CC=C(\C=C\C(=O)OCC=C(C)C)C=C1OC	0.397	0.387	0.408861	0.395705
110	caffeic acid methyl ester	COC(=O)\C=C\C1=CC=C(O)C(O)=C1	0.412	0.406	0.339574	0.393961
153	Methyl chavicol	COC1=CC=C(CC=C)C=C1	0.361	0.487	0.284615	0.393177
288	pinoresinol	COC1=C(O)C=CC(=C1)[C@H]1OC[C@H]2[C@@H]1CO[C@@H]2C1=CC(OC)=C(O)C=C1	0.345	0.4	0.459675	0.391168
287	kobusin	COC1=C(OC)C=C(C=C1)[C@H]1OC[C@H]2[C@@H]1CO[C@@H]2C1=CC2=C(OCO2)C=C1	0.387	0.349	0.471231	0.390576
75	Pinocembrin	OC1=CC(O)=C2C(=O)C[C@H](OC2=C1)C1=CC=CC=C1	0.443	0.344	0.375725	0.390094
228	Diosmetin	COC1=C(O)C=C(C=C1)C1=CC(=O)C2=C(O)C=C(O)C=C2O1	0.474	0.277	0.438402	0.390048
105	(S)-4',5-dihydroxy-3',7-dimethoxyflavanone (eriodictyol-3',7-dimethyl ether)	COC1=CC(O)=C2C(=O)C(=COC2=C1)C1=CC(OC)=C(O)C=C1	0.315	0.478	0.365023	0.388926
269	cirsimaritin	COC1=C(OC)C(O)=C2C(=O)C=C(OC2=C1)C1=CC=C(O)C=C1	0.354	0.44	0.360025	0.388584
85	ethyl caffeate	CCOC(=O)\C=C\C1=CC(O)=C(O)C=C1	0.404	0.386	0.363056	0.38815
182	cycloethulia-coumarin	CC1=CC=CC2=C1C1=C(C(=O)O2)[C@](C)(C[C@@]2(OCC3(C)OC23)O1)C=C	0.283	0.476	0.411256	0.385512
111	ferulic acid methyl ester	COC(=O)\C=C\C1=CC=C(O)C(OC)=C1	0.359	0.421	0.365429	0.384385
99	(S)-7-hydroxyflavanone	OC1=CC=C2C(=O)C[C@H](OC2=C1)C1=CC=CC=C1	0.43	0.368	0.327892	0.383851
133	quercetin3,7,30 ,40 -tetramethylether	COC1=CC2=C(C(O)=C1)C(=O)C(OC)=C(O2)C1=CC(OC)=C(OC)C=C1	0.327	0.424	0.410955	0.382752
112	ferulic acid ethyl ester	CCOC(=O)\C=C\C1=CC=C(O)C(OC)=C1	0.364	0.399	0.38096	0.381223
274	Aesculetin	OC1=C(O)C=C2C=CC(=O)OC2=C1	0.412	0.398	0.292657	0.380684
262	formononetin	COC1=CC=C(C=C1)C1=COC2=C(C=CC(O)=C2)C1=O	0.453	0.345	0.301894	0.378419
113	ferulic acid prenyl ester	COC1=CC(\C=C\C(=O)OCC=C(C)C)=CC=C1O	0.37	0.356	0.421796	0.375823
183	Nivegin	OC1=CC=C(C=C1)C1=CC(=O)OC2=C1C(O)=CC(O)=C2	0.424	0.369	0.296997	0.375157
73	3-Methyl-galangin	COC1=C(OC2=CC(O)=CC(O)=C2C1=O)C1=CC=CC=C1	0.347	0.422	0.323986	0.371026
215	jaceosidin	COC1=C(O)C=CC(=C1)C1=CC(=O)C2=C(O1)C=C(O)C(OC)=C2O	0.359	0.341	0.440347	0.369689
176	Trans-Ferulic acid O-hexan-3-onyl-ether	CCCC(=O)CCOC1=CC=C(\C=C\C(O)=O)C=C1OC	0.34	0.331	0.48718	0.368458
190	arctigenin	[H]C1=C(O)C(OC)=CC(C[C@]2([H])C(=O)OC[C@@]2([H])CC2=CC(OC)=C(OC)C=C2)=C1	0.337	0.336	0.474451	0.366442
220	Retusin	COC1=CC(O)=C2C(=O)C(OC)=C(OC2=C1)C1=CC(OC)=C(OC)C=C1	0.327	0.364	0.425406	0.362672
170	3-Prenyl-4-hydroxycinnamic acid	[H]C1=C(O)C(CC=C(C)C)=CC(\C=C\C(O)=O)=C1	0.394	0.306	0.398929	0.361019
138	Eupatilin	COC1=C(OC)C=C(C=C1)C1=CC(=O)C2=C(O)C(OC)=C(O)C=C2O1	0.353	0.339	0.41173	0.360328
120	7-Methoxycoumarin	[H]C1=C(OC)C=C2OC(=O)C([H])=C([H])C2=C1	0.385	0.385	0.259042	0.357665
216	Coniferyl aldehyde	COC1=CC(\C=C\C=O)=CC=C1O	0.303	0.421	0.333185	0.355209
119	7-Isopentenyloxycoumarin	[H]C1=C(OC=C(C)C)C=C2OC(=O)C([H])=C([H])C2=C1	0.436	0.295	0.310277	0.354158
168	Daphnetin	OC1=C(O)C2=C(C=CC(=O)O2)C=C1	0.385	0.351	0.301424	0.353707
189	matairesinol	[H]C1=C(O)C(OC)=CC(C[C@]2([H])C(=O)OC[C@@]2([H])CC2=CC(OC)=C(O)C=C2)=C1	0.33	0.292	0.505915	0.353473
93	Nutanocumarin	C[C@H]1OC2=C(C(=O)OC3=C2C(C)=CC(O)=C3)[C@]1(C)CC\C=C(\C)CO	0.286	0.347	0.484912	0.35277
106	6,7-dimethoxycoumarin	COC1=C(OC)C=C2C=CC(=O)OC2=C1	0.316	0.426	0.282663	0.351328
295	dillapiol	COC1=C(OC)C(CC=C)=CC2=C1OCO2	0.298	0.408	0.340066	0.349692
82	Quercetin-7,3',4'-trimethyl ether	COC1=CC(O)=C2C(=O)C(O)=C(OC2=C1)C1=CC(OC)=C(OC)C=C1	0.335	0.321	0.422366	0.348543
108	5,7-dihydroxy-4´,6-dimethoxyflavone	COC1=CC=C(C=C1)C1=CC(=O)C2=C(O)C(OC)=C(O)C=C2O1	0.347	0.34	0.364368	0.348061
2	trans-caffeic acid	OC(=O)\C=C\C1=CC(O)=C(O)C=C1	0.387	0.31	0.325528	0.343866
109	cinnamic acid methyl ester	[H]C1=CC=C(\C=C\C(=O)OC)C=C1[H]	0.449	0.281	0.258662	0.342689
123	santin	COC1=CC=C(C=C1)C1=C(OC)C(=O)C2=C(O1)C=C(O)C(OC)=C2O	0.321	0.344	0.378259	0.342325
135	quercetin-7,3`,4`-trimethyl ether	COC1=CC2=C(C(O)=C1)C(=O)C(O)=C(O2)C1=CC(OC)=C(OC)C=C1	0.335	0.311	0.409232	0.341823
25	p-coumaric acid	OC(=O)\C=C\C1=CC=C(O)C=C1	0.433	0.279	0.279693	0.340142
58	o-coumaric acid	OC(=O)\C=C\C1=CC=CC=C1O	0.383	0.321	0.281374	0.336956
169	Herniarin	COC1=CC2=C(C=CC(=O)O2)C=C1	0.385	0.325	0.267833	0.336357
26	sinapic acid	COC1=CC(\C=C\C(O)=O)=CC(OC)=C1O	0.295	0.334	0.414976	0.336127
1	cis-caffeic acid	OC(=O)\C=C/C1=CC(O)=C(O)C=C1	0.387	0.308	0.28829	0.335011
3	cis-ferulic acid	COC1=C(O)C=CC(\C=C/C(O)=O)=C1	0.338	0.314	0.310803	0.322811
91	Umbeliferone	OC1=CC=C2C=CC(=O)OC2=C1	0.416	0.264	0.254321	0.322099
181	5,7,4_x0002_ -Trihydroxy-6,8-dimethoxyflavone	[H]C1=C(O)C=CC(=C1)C1=C([H])C(=O)C2=C(O1)C(OC)=C(O)C(OC)=C2O	0.352	0.252	0.387821	0.32108
29	umbelliferone	OC1=CC2=C(C=C1)C=CC(=O)O2	0.416	0.267	0.24042	0.320243
32	scopoletin	COC1=C(O)C=C2OC(=O)C=CC2=C1	0.339	0.296	0.323064	0.318904
59	hesperetic acid	COC1=C(O)C=C(\C=C\C(O)=O)C=C1	0.386	0.241	0.314353	0.314346
4	trans-ferulic acid	COC1=C(O)C=CC(\C=C\C(O)=O)=C1	0.338	0.259	0.327233	0.305096
60	methoxycinnamic acid	COC(=CC1=CC=CC=C1)C(O)=O	0.347	0.249	0.256669	0.289477
229	m-methoxy cinnamic acid	COC1=CC=CC(\C=C\C(O)=O)=C1	0.376	0.163	0.315025	0.28035

## Sheet: Table S3
Properties	237	306	308
LogS	-4.493	-5.171	-4.281
LogD	1.209	3.854	3.184
LogP	1.834	6.207	3.686
Pgp-inh	0	0.999	0.899
Pgp-sub	0.007	0.115	0.008
HIA	0.185	0.002	0.005
F(20%)	0.004	0.003	0.003
F(30%)	0.824	0.123	0.011
Caco-2	-6.174	-5.26	-4.93
MDCK	5.53691e-06	4.33203e-05	1.15624e-05
BBB	0.025	0.003	0.031
PPB	0.922551	0.817739	0.935479
VDss	0.432	0.395	0.438
Fu	0.0439315	0.0997135	0.0583338
CYP1A2-inh	0.065	0.062	0.072
CYP1A2-sub	0.012	0.817	0.613
CYP2C19-inh	0.038	0.566	0.398
CYP2C19-sub	0.029	0.8	0.698
CYP2C9-inh	0.629	0.924	0.887
CYP2C9-sub	0.991	0.792	0.753
CYP2D6-inh	0.055	0.008	0.132
CYP2D6-sub	0.138	0.936	0.832
CYP3A4-inh	0.081	0.955	0.833
CYP3A4-sub	0.015	0.929	0.918
CL	6.583	11.283	12.235
T12	0.952	0.716	0.585
hERG	0.007	0.212	0.175
H-HT	0.6	0.138	0.203
DILI	0.977	0.934	0.842
Ames	0.07	0.044	0.046
ROA	0.839	0.027	0.391
FDAMDD	0.007	0.855	0.877
SkinSen	0.941	0.961	0.928
Carcinogenicity	0.317	0.033	0.043
EC	0.003	0.003	0.003
EI	0.907	0.051	0.073
Respiratory	0.013	0.336	0.131
BCF	0.671	1.407	1.824
IGC50	4.596	5.537	5.166
LC50	5.526	6.47	7.159
LC50DM	6.029	7.435	7.053
NR-AR	0.03	0.393	0.508
NR-AR-LBD	0.647	0.085	0.159
NR-AhR	0.443	0.597	0.635
NR-Aromatase	0.187	0.587	0.55
NR-ER	0.742	0.319	0.476
NR-ER-LBD	0.618	0.046	0.013
NR-PPAR-gamma	0.6	0.759	0.818
SR-ARE	0.161	0.84	0.553
SR-ATAD5	0.093	0.776	0.596
SR-HSE	0.311	0.337	0.318
SR-MMP	0.225	0.888	0.914
SR-p53	0.462	0.953	0.845
MW	538.11	742.3	536.2
Vol	512.531	752.221	537.401
Dense	1.05	0.987	0.998
nHA	12	12	9
nHD	7	2	3
TPSA	211.28	148.44	123.91
nRot	9	15	9
nRing	4	6	5
MaxRing	9	6	9
nHet	12	12	9
fChar	0	0	0
nRig	26	36	28
Flex	0.346	0.417	0.321
nStereo	3	4	4
NonGenotoxic_Carcinogenicity	1	0	0
LD50_oral	0	0	0
Genotoxic_Carcinogenicity_Mutagenicity	1	0	0
SureChEMBL	0	0	0
NonBiodegradable	1	1	0
Skin_Sensitization	11	6	5
Acute_Aquatic_Toxicity	3	2	4
Toxicophores	3	1	1
QED	0.125	0.138	0.349
Synth	4.025	4.287	4.062
Fsp3	0.148	0.381	0.367
MCE-18	87.613	121.862	97.317
Natural	1.36	0.748	1.73
Product-likeness	3	3	3
Alarm_NMR	1	0	0
BMS	2	1	1
Chelating	1	0	0
PAINS	Rejected	Rejected	Accepted
Lipinski	Accepted	Accepted	Accepted
Pfizer	Rejected	Rejected	Rejected
GSK	Rejected	Rejected	Rejected
cLogP	2.2492	5.6926	3.9951
cLogS	-3.239	-7.112	-4.347
Druglikeness	-3.5203	0.39139	0.43338
Mutagenic	none	none	none
Tumorigenic	none	none	none
Reproductive Effective	none	none	none
Irritant	none	none	none

## Sheet: Table S4
	Trees	CCR	Sensitivity	PPV	Specificity	NPV	Coverage	MCC	AUC
	500	0.79495	0.820669	0.803571	0.769231	0.78853	1	0.591	0.883
	200	0.798903	0.81459	0.812121	0.783217	0.785965	1	0.597946	0.884
	1000	0.780842	0.843373	0.777778	0.71831	0.796875	1	0.568131	0.86
	100	0.79191	0.81459	0.802395	0.769231	0.782918	1	0.584566	0.883
	800	0.793658	0.81459	0.804805	0.772727	0.783688	1	0.587905	0.883
Split criterion	Trees	CCR	Sensitivity	PPV	Specificity	NPV	Coverage	MCC	AUC
Gini index	200 trees	0.798903	0.81459	0.812121	0.783217	0.785965	1	0.597946	0.884
information gain ratio	200 trees	0.713855	0.759878	0.724638	0.667832	0.707407	1	0.429872	0.786
Information gain	200 trees	0.788722	0.787234	0.811912	0.79021	0.763514	1	0.576434	0.877
